# Supplementary material for: Mriyaviruses: Small Relatives of Giant Viruses
Source: PubMed Central journal article supplement (PMC10962738; doi:10.1101/2024.02.29.582850), 2024-02-29
Supplement: media-1.pdf [file media-1.pdf]

## Supplementary figures

S1 Multiple sequence alignment (MSA) of *Yaraviridae* MCP proteins.

S2 MSA of “*Gamadviridae*” MCP proteins.

S3 Top hits of HHpred searches initiated with *Yaraviridae* and “*Gamadviridae*” MCP protein MSAs.

S4 VLF2 protein MSA.

S5. Top hits of HHpred searches initiated with Mriyavirus VLF2 protein MSA.

S6. Top HHpred hits for “*Gamadviridae*” (right) and *Yaraviridae* (left) RuvC MSAs.

S7. Phylogenetic tree of RuvC proteins.

S8. MSA of selected SF3\_hel1 proteins.

S9. Phylogenetic tree of SF3\_hel1 proteins.

S10. SF3\_hel2 protein MSA.

S11. Top hits of HHpred search initiated with Mriyavirus HUH endonuclease MSA.

S12. MSA of HUH and C-terminal domain of HUH\_long proteins.

S12. MSA of mriyavirus PDDEXK nuclease.

S13. Phylogenetic tree of PDDEXK nucleases.

S14. MSA of Yaravirus gene 48 and its homologs in mriyaviruses (Mriya\_48) and in NCBI Genbank (nr) database.

S15. A, Phylogenetic tree of Mriya\_48; B, predicted structures of two Mriya\_48 proteins.

S16. MSA of Yaravirus gene 50 and its homologs in mriyaviruses (Mriya\_50) and in NCBI Genbank (nr) database.

S17. Predicted structure of Mriya\_50 (exemplified with Ple2@KY346835\_21). Leucine site chains highlighted in magenta.

S18. MSA of conserved domain of Yaravirus gene 1 and its homologs in mriyaviruses (Mriya\_1).

S19. Predicted structure of Mriya\_1, exemplified with Ple2@KY346835\_29.

S20. A, MSA of Yaravirus gene 51 with mriyavirus and nr homologs. B, Predicted structure of Yaravirus gene 51.

S21. A, Predicted structure of PEV\_22; B, same structure overlaid with 6g41\_A – the structure of minor capsid protein of Cafeteria mavirus.

S22. Predicted structure of PEV\_26 superimposed with gp2.5, a single strand DNA binding protein from bacteriophage T7 (pdb 1je5, green, z-score 13.3).

S23. Predicted structure of Yaravirus minor capsid protein

S24. MSA of Yaravirus minor capsid protein and related sequences.

# Varaviridae MCP

|                 |   |   |   |   |   |   |   |   |   |    |    |    |    |    |    |    |    |    |    |    |    |    |    |    |    |    |    |    |    |    |    |    |    |    |    |    |    |    |    |    |    |    |    |    |    |    |    |    |    |    |    |    |    |    |    |    |    |    |    |    |    |    |    |    |    |    |    |    |    |    |    |    |    |    |    |    |    |    |    |    |    |    |    |    |    |    |    |    |    |    |    |    |    |    |    |    |    |    |    |     |     |     |     |     |     |     |     |     |     |     |     |     |     |     |     |     |     |     |     |     |     |     |     |     |     |     |     |     |     |     |     |     |     |     |     |     |     |     |     |     |     |     |     |     |     |     |     |     |     |     |     |     |     |     |     |     |     |     |     |     |     |     |     |     |     |     |     |     |     |     |     |     |     |     |     |     |     |     |     |     |     |     |     |     |     |     |     |     |     |     |     |     |     |     |     |     |     |     |     |     |     |     |     |     |     |     |     |     |     |     |     |     |     |     |     |     |     |     |     |     |     |     |     |     |     |     |     |     |     |     |     |     |     |     |     |     |     |     |     |     |     |     |     |     |     |     |     |     |     |     |     |     |     |     |     |     |     |     |     |     |     |     |     |     |     |     |     |     |     |     |     |     |     |     |     |     |     |     |     |     |     |     |     |     |     |     |     |     |     |     |     |     |     |     |     |     |     |     |     |     |     |     |     |     |     |     |     |     |     |     |     |     |     |     |     |     |     |     |     |     |     |     |     |     |     |     |     |     |     |     |     |     |     |     |     |     |     |     |     |     |     |     |     |     |     |     |     |     |     |     |     |     |     |     |     |     |     |     |     |     |     |     |     |     |     |     |     |     |     |     |     |     |     |     |     |     |     |     |     |     |     |     |     |     |     |     |     |     |     |     |     |     |     |     |     |     |     |     |     |     |     |     |     |     |     |     |     |     |     |     |     |     |     |     |     |     |     |     |     |     |     |     |     |     |     |     |     |     |     |     |     |     |     |     |     |     |     |     |     |     |     |     |     |     |     |     |     |     |     |     |     |     |     |     |     |     |     |     |     |     |     |     |     |     |     |     |     |     |     |     |     |     |     |     |     |     |     |     |     |     |     |     |     |     |     |     |     |     |     |     |     |     |     |     |     |     |     |     |     |     |     |     |     |     |     |     |     |     |     |     |     |     |     |     |     |     |     |     |     |     |     |     |     |     |     |     |     |     |     |     |     |     |     |     |     |     |     |     |     |     |     |     |     |     |     |     |     |     |     |     |     |     |     |     |     |     |     |     |     |     |     |     |     |     |     |     |     |     |     |     |     |     |     |     |     |     |     |     |     |     |     |     |     |     |     |     |     |     |     |     |     |     |     |     |     |     |     |     |     |     |     |     |     |     |     |     |     |     |     |     |     |     |     |     |     |     |     |     |     |     |     |     |     |     |     |     |     |     |     |     |     |     |     |     |     |     |     |     |     |     |     |     |     |     |     |     |     |     |     |     |     |     |     |     |     |     |     |     |     |     |     |     |     |     |     |     |     |     |     |     |     |     |     |     |     |     |     |     |     |     |     |     |     |     |     |     |     |     |     |     |     |     |     |     |     |     |     |     |     |     |     |     |     |     |     |     |     |     |     |     |     |     |     |     |     |     |     |     |     |     |     |     |     |     |     |     |     |     |     |     |     |     |     |     |     |     |     |     |     |     |     |     |     |     |     |     |     |     |     |     |     |     |     |     |     |     |     |     |     |     |     |     |     |     |     |     |     |     |     |     |     |     |     |     |     |     |     |     |     |     |     |     |     |     |     |     |     |     |     |     |     |     |     |     |     |     |     |     |     |     |     |     |     |     |     |     |     |     |     |     |     |     |     |     |     |     |     |     |     |     |     |     |     |     |     |     |     |     |     |     |     |     |     |     |     |     |     |     |     |     |     |     |     |     |     |     |     |     |     |     |     |     |     |     |     |     |     |     |     |     |     |     |     |     |     |     |     |     |     |     |     |     |     |     |     |     |     |     |     |     |     |     |     |     |     |     |     |     |     |     |     |     |     |     |     |     |     |     |     |     |     |     |     |     |     |     |     |     |     |     |     |     |     |     |     |     |     |     |     |     |     |     |     |     |     |     |     |     |     |     |     |     |     |     |     |     |     |     |     |     |     |     |     |     |     |     |     |     |     |     |     |     |     |     |     |     |     |     |     |     |     |     |     |     |     |     |     |     |     |     |     |     |     |     |     |     |     |     |     |     |     |     |     |     |     |     |     |     |     |     |     |     |     |     |     |     |     |     |     |      |
|-----------------|---|---|---|---|---|---|---|---|---|----|----|----|----|----|----|----|----|----|----|----|----|----|----|----|----|----|----|----|----|----|----|----|----|----|----|----|----|----|----|----|----|----|----|----|----|----|----|----|----|----|----|----|----|----|----|----|----|----|----|----|----|----|----|----|----|----|----|----|----|----|----|----|----|----|----|----|----|----|----|----|----|----|----|----|----|----|----|----|----|----|----|----|----|----|----|----|----|----|----|-----|-----|-----|-----|-----|-----|-----|-----|-----|-----|-----|-----|-----|-----|-----|-----|-----|-----|-----|-----|-----|-----|-----|-----|-----|-----|-----|-----|-----|-----|-----|-----|-----|-----|-----|-----|-----|-----|-----|-----|-----|-----|-----|-----|-----|-----|-----|-----|-----|-----|-----|-----|-----|-----|-----|-----|-----|-----|-----|-----|-----|-----|-----|-----|-----|-----|-----|-----|-----|-----|-----|-----|-----|-----|-----|-----|-----|-----|-----|-----|-----|-----|-----|-----|-----|-----|-----|-----|-----|-----|-----|-----|-----|-----|-----|-----|-----|-----|-----|-----|-----|-----|-----|-----|-----|-----|-----|-----|-----|-----|-----|-----|-----|-----|-----|-----|-----|-----|-----|-----|-----|-----|-----|-----|-----|-----|-----|-----|-----|-----|-----|-----|-----|-----|-----|-----|-----|-----|-----|-----|-----|-----|-----|-----|-----|-----|-----|-----|-----|-----|-----|-----|-----|-----|-----|-----|-----|-----|-----|-----|-----|-----|-----|-----|-----|-----|-----|-----|-----|-----|-----|-----|-----|-----|-----|-----|-----|-----|-----|-----|-----|-----|-----|-----|-----|-----|-----|-----|-----|-----|-----|-----|-----|-----|-----|-----|-----|-----|-----|-----|-----|-----|-----|-----|-----|-----|-----|-----|-----|-----|-----|-----|-----|-----|-----|-----|-----|-----|-----|-----|-----|-----|-----|-----|-----|-----|-----|-----|-----|-----|-----|-----|-----|-----|-----|-----|-----|-----|-----|-----|-----|-----|-----|-----|-----|-----|-----|-----|-----|-----|-----|-----|-----|-----|-----|-----|-----|-----|-----|-----|-----|-----|-----|-----|-----|-----|-----|-----|-----|-----|-----|-----|-----|-----|-----|-----|-----|-----|-----|-----|-----|-----|-----|-----|-----|-----|-----|-----|-----|-----|-----|-----|-----|-----|-----|-----|-----|-----|-----|-----|-----|-----|-----|-----|-----|-----|-----|-----|-----|-----|-----|-----|-----|-----|-----|-----|-----|-----|-----|-----|-----|-----|-----|-----|-----|-----|-----|-----|-----|-----|-----|-----|-----|-----|-----|-----|-----|-----|-----|-----|-----|-----|-----|-----|-----|-----|-----|-----|-----|-----|-----|-----|-----|-----|-----|-----|-----|-----|-----|-----|-----|-----|-----|-----|-----|-----|-----|-----|-----|-----|-----|-----|-----|-----|-----|-----|-----|-----|-----|-----|-----|-----|-----|-----|-----|-----|-----|-----|-----|-----|-----|-----|-----|-----|-----|-----|-----|-----|-----|-----|-----|-----|-----|-----|-----|-----|-----|-----|-----|-----|-----|-----|-----|-----|-----|-----|-----|-----|-----|-----|-----|-----|-----|-----|-----|-----|-----|-----|-----|-----|-----|-----|-----|-----|-----|-----|-----|-----|-----|-----|-----|-----|-----|-----|-----|-----|-----|-----|-----|-----|-----|-----|-----|-----|-----|-----|-----|-----|-----|-----|-----|-----|-----|-----|-----|-----|-----|-----|-----|-----|-----|-----|-----|-----|-----|-----|-----|-----|-----|-----|-----|-----|-----|-----|-----|-----|-----|-----|-----|-----|-----|-----|-----|-----|-----|-----|-----|-----|-----|-----|-----|-----|-----|-----|-----|-----|-----|-----|-----|-----|-----|-----|-----|-----|-----|-----|-----|-----|-----|-----|-----|-----|-----|-----|-----|-----|-----|-----|-----|-----|-----|-----|-----|-----|-----|-----|-----|-----|-----|-----|-----|-----|-----|-----|-----|-----|-----|-----|-----|-----|-----|-----|-----|-----|-----|-----|-----|-----|-----|-----|-----|-----|-----|-----|-----|-----|-----|-----|-----|-----|-----|-----|-----|-----|-----|-----|-----|-----|-----|-----|-----|-----|-----|-----|-----|-----|-----|-----|-----|-----|-----|-----|-----|-----|-----|-----|-----|-----|-----|-----|-----|-----|-----|-----|-----|-----|-----|-----|-----|-----|-----|-----|-----|-----|-----|-----|-----|-----|-----|-----|-----|-----|-----|-----|-----|-----|-----|-----|-----|-----|-----|-----|-----|-----|-----|-----|-----|-----|-----|-----|-----|-----|-----|-----|-----|-----|-----|-----|-----|-----|-----|-----|-----|-----|-----|-----|-----|-----|-----|-----|-----|-----|-----|-----|-----|-----|-----|-----|-----|-----|-----|-----|-----|-----|-----|-----|-----|-----|-----|-----|-----|-----|-----|-----|-----|-----|-----|-----|-----|-----|-----|-----|-----|-----|-----|-----|-----|-----|-----|-----|-----|-----|-----|-----|-----|-----|-----|-----|-----|-----|-----|-----|-----|-----|-----|-----|-----|-----|-----|-----|-----|-----|-----|-----|-----|-----|-----|-----|-----|-----|-----|-----|-----|-----|-----|-----|-----|-----|-----|-----|-----|-----|-----|-----|-----|-----|-----|-----|-----|-----|-----|-----|-----|-----|-----|-----|-----|-----|-----|-----|-----|-----|-----|-----|-----|-----|-----|-----|-----|-----|-----|-----|-----|-----|-----|-----|-----|-----|-----|-----|-----|-----|-----|-----|-----|-----|-----|-----|-----|-----|-----|-----|-----|-----|-----|-----|-----|-----|-----|-----|-----|-----|-----|-----|-----|-----|-----|-----|-----|-----|-----|-----|-----|-----|-----|-----|-----|-----|-----|-----|-----|-----|-----|-----|-----|-----|-----|-----|-----|-----|-----|-----|-----|-----|-----|-----|-----|-----|-----|-----|-----|-----|-----|-----|-----|-----|-----|-----|-----|-----|-----|-----|-----|-----|-----|-----|-----|-----|-----|-----|-----|-----|-----|-----|-----|-----|-----|-----|-----|-----|-----|-----|-----|-----|-----|-----|-----|-----|-----|-----|-----|-----|-----|-----|-----|-----|-----|-----|-----|-----|-----|-----|-----|-----|-----|-----|-----|-----|-----|-----|------|
| Varaviridae MCP | 1 | 2 | 3 | 4 | 5 | 6 | 7 | 8 | 9 | 10 | 11 | 12 | 13 | 14 | 15 | 16 | 17 | 18 | 19 | 20 | 21 | 22 | 23 | 24 | 25 | 26 | 27 | 28 | 29 | 30 | 31 | 32 | 33 | 34 | 35 | 36 | 37 | 38 | 39 | 40 | 41 | 42 | 43 | 44 | 45 | 46 | 47 | 48 | 49 | 50 | 51 | 52 | 53 | 54 | 55 | 56 | 57 | 58 | 59 | 60 | 61 | 62 | 63 | 64 | 65 | 66 | 67 | 68 | 69 | 70 | 71 | 72 | 73 | 74 | 75 | 76 | 77 | 78 | 79 | 80 | 81 | 82 | 83 | 84 | 85 | 86 | 87 | 88 | 89 | 90 | 91 | 92 | 93 | 94 | 95 | 96 | 97 | 98 | 99 | 100 | 101 | 102 | 103 | 104 | 105 | 106 | 107 | 108 | 109 | 110 | 111 | 112 | 113 | 114 | 115 | 116 | 117 | 118 | 119 | 120 | 121 | 122 | 123 | 124 | 125 | 126 | 127 | 128 | 129 | 130 | 131 | 132 | 133 | 134 | 135 | 136 | 137 | 138 | 139 | 140 | 141 | 142 | 143 | 144 | 145 | 146 | 147 | 148 | 149 | 150 | 151 | 152 | 153 | 154 | 155 | 156 | 157 | 158 | 159 | 160 | 161 | 162 | 163 | 164 | 165 | 166 | 167 | 168 | 169 | 170 | 171 | 172 | 173 | 174 | 175 | 176 | 177 | 178 | 179 | 180 | 181 | 182 | 183 | 184 | 185 | 186 | 187 | 188 | 189 | 190 | 191 | 192 | 193 | 194 | 195 | 196 | 197 | 198 | 199 | 200 | 201 | 202 | 203 | 204 | 205 | 206 | 207 | 208 | 209 | 210 | 211 | 212 | 213 | 214 | 215 | 216 | 217 | 218 | 219 | 220 | 221 | 222 | 223 | 224 | 225 | 226 | 227 | 228 | 229 | 230 | 231 | 232 | 233 | 234 | 235 | 236 | 237 | 238 | 239 | 240 | 241 | 242 | 243 | 244 | 245 | 246 | 247 | 248 | 249 | 250 | 251 | 252 | 253 | 254 | 255 | 256 | 257 | 258 | 259 | 260 | 261 | 262 | 263 | 264 | 265 | 266 | 267 | 268 | 269 | 270 | 271 | 272 | 273 | 274 | 275 | 276 | 277 | 278 | 279 | 280 | 281 | 282 | 283 | 284 | 285 | 286 | 287 | 288 | 289 | 290 | 291 | 292 | 293 | 294 | 295 | 296 | 297 | 298 | 299 | 300 | 301 | 302 | 303 | 304 | 305 | 306 | 307 | 308 | 309 | 310 | 311 | 312 | 313 | 314 | 315 | 316 | 317 | 318 | 319 | 320 | 321 | 322 | 323 | 324 | 325 | 326 | 327 | 328 | 329 | 330 | 331 | 332 | 333 | 334 | 335 | 336 | 337 | 338 | 339 | 340 | 341 | 342 | 343 | 344 | 345 | 346 | 347 | 348 | 349 | 350 | 351 | 352 | 353 | 354 | 355 | 356 | 357 | 358 | 359 | 360 | 361 | 362 | 363 | 364 | 365 | 366 | 367 | 368 | 369 | 370 | 371 | 372 | 373 | 374 | 375 | 376 | 377 | 378 | 379 | 380 | 381 | 382 | 383 | 384 | 385 | 386 | 387 | 388 | 389 | 390 | 391 | 392 | 393 | 394 | 395 | 396 | 397 | 398 | 399 | 400 | 401 | 402 | 403 | 404 | 405 | 406 | 407 | 408 | 409 | 410 | 411 | 412 | 413 | 414 | 415 | 416 | 417 | 418 | 419 | 420 | 421 | 422 | 423 | 424 | 425 | 426 | 427 | 428 | 429 | 430 | 431 | 432 | 433 | 434 | 435 | 436 | 437 | 438 | 439 | 440 | 441 | 442 | 443 | 444 | 445 | 446 | 447 | 448 | 449 | 450 | 451 | 452 | 453 | 454 | 455 | 456 | 457 | 458 | 459 | 460 | 461 | 462 | 463 | 464 | 465 | 466 | 467 | 468 | 469 | 470 | 471 | 472 | 473 | 474 | 475 | 476 | 477 | 478 | 479 | 480 | 481 | 482 | 483 | 484 | 485 | 486 | 487 | 488 | 489 | 490 | 491 | 492 | 493 | 494 | 495 | 496 | 497 | 498 | 499 | 500 | 501 | 502 | 503 | 504 | 505 | 506 | 507 | 508 | 509 | 510 | 511 | 512 | 513 | 514 | 515 | 516 | 517 | 518 | 519 | 520 | 521 | 522 | 523 | 524 | 525 | 526 | 527 | 528 | 529 | 530 | 531 | 532 | 533 | 534 | 535 | 536 | 537 | 538 | 539 | 540 | 541 | 542 | 543 | 544 | 545 | 546 | 547 | 548 | 549 | 550 | 551 | 552 | 553 | 554 | 555 | 556 | 557 | 558 | 559 | 560 | 561 | 562 | 563 | 564 | 565 | 566 | 567 | 568 | 569 | 570 | 571 | 572 | 573 | 574 | 575 | 576 | 577 | 578 | 579 | 580 | 581 | 582 | 583 | 584 | 585 | 586 | 587 | 588 | 589 | 590 | 591 | 592 | 593 | 594 | 595 | 596 | 597 | 598 | 599 | 600 | 601 | 602 | 603 | 604 | 605 | 606 | 607 | 608 | 609 | 610 | 611 | 612 | 613 | 614 | 615 | 616 | 617 | 618 | 619 | 620 | 621 | 622 | 623 | 624 | 625 | 626 | 627 | 628 | 629 | 630 | 631 | 632 | 633 | 634 | 635 | 636 | 637 | 638 | 639 | 640 | 641 | 642 | 643 | 644 | 645 | 646 | 647 | 648 | 649 | 650 | 651 | 652 | 653 | 654 | 655 | 656 | 657 | 658 | 659 | 660 | 661 | 662 | 663 | 664 | 665 | 666 | 667 | 668 | 669 | 670 | 671 | 672 | 673 | 674 | 675 | 676 | 677 | 678 | 679 | 680 | 681 | 682 | 683 | 684 | 685 | 686 | 687 | 688 | 689 | 690 | 691 | 692 | 693 | 694 | 695 | 696 | 697 | 698 | 699 | 700 | 701 | 702 | 703 | 704 | 705 | 706 | 707 | 708 | 709 | 710 | 711 | 712 | 713 | 714 | 715 | 716 | 717 | 718 | 719 | 720 | 721 | 722 | 723 | 724 | 725 | 726 | 727 | 728 | 729 | 730 | 731 | 732 | 733 | 734 | 735 | 736 | 737 | 738 | 739 | 740 | 741 | 742 | 743 | 744 | 745 | 746 | 747 | 748 | 749 | 750 | 751 | 752 | 753 | 754 | 755 | 756 | 757 | 758 | 759 | 760 | 761 | 762 | 763 | 764 | 765 | 766 | 767 | 768 | 769 | 770 | 771 | 772 | 773 | 774 | 775 | 776 | 777 | 778 | 779 | 780 | 781 | 782 | 783 | 784 | 785 | 786 | 787 | 788 | 789 | 790 | 791 | 792 | 793 | 794 | 795 | 796 | 797 | 798 | 799 | 800 | 801 | 802 | 803 | 804 | 805 | 806 | 807 | 808 | 809 | 810 | 811 | 812 | 813 | 814 | 815 | 816 | 817 | 818 | 819 | 820 | 821 | 822 | 823 | 824 | 825 | 826 | 827 | 828 | 829 | 830 | 831 | 832 | 833 | 834 | 835 | 836 | 837 | 838 | 839 | 840 | 841 | 842 | 843 | 844 | 845 | 846 | 847 | 848 | 849 | 850 | 851 | 852 | 853 | 854 | 855 | 856 | 857 | 858 | 859 | 860 | 861 | 862 | 863 | 864 | 865 | 866 | 867 | 868 | 869 | 870 | 871 | 872 | 873 | 874 | 875 | 876 | 877 | 878 | 879 | 880 | 881 | 882 | 883 | 884 | 885 | 886 | 887 | 888 | 889 | 890 | 891 | 892 | 893 | 894 | 895 | 896 | 897 | 898 | 899 | 900 | 901 | 902 | 903 | 904 | 905 | 906 | 907 | 908 | 909 | 910 | 911 | 912 | 913 | 914 | 915 | 916 | 917 | 918 | 919 | 920 | 921 | 922 | 923 | 924 | 925 | 926 | 927 | 928 | 929 | 930 | 931 | 932 | 933 | 934 | 935 | 936 | 937 | 938 | 939 | 940 | 941 | 942 | 943 | 944 | 945 | 946 | 947 | 948 | 949 | 950 | 951 | 952 | 953 | 954 | 955 | 956 | 957 | 958 | 959 | 960 | 961 | 962 | 963 | 964 | 965 | 966 | 967 | 968 | 969 | 970 | 971 | 972 | 973 | 974 | 975 | 976 | 977 | 978 | 979 | 980 | 981 | 982 | 983 | 984 | 985 | 986 | 987 | 988 | 989 | 990 | 991 | 992 | 993 | 994 | 995 | 996 | 997 | 998 | 999 | 1000 |
|-----------------|---|---|---|---|---|---|---|---|---|----|----|----|----|----|----|----|----|----|----|----|----|----|----|----|----|----|----|----|----|----|----|----|----|----|----|----|----|----|----|----|----|----|----|----|----|----|----|----|----|----|----|----|----|----|----|----|----|----|----|----|----|----|----|----|----|----|----|----|----|----|----|----|----|----|----|----|----|----|----|----|----|----|----|----|----|----|----|----|----|----|----|----|----|----|----|----|----|----|----|-----|-----|-----|-----|-----|-----|-----|-----|-----|-----|-----|-----|-----|-----|-----|-----|-----|-----|-----|-----|-----|-----|-----|-----|-----|-----|-----|-----|-----|-----|-----|-----|-----|-----|-----|-----|-----|-----|-----|-----|-----|-----|-----|-----|-----|-----|-----|-----|-----|-----|-----|-----|-----|-----|-----|-----|-----|-----|-----|-----|-----|-----|-----|-----|-----|-----|-----|-----|-----|-----|-----|-----|-----|-----|-----|-----|-----|-----|-----|-----|-----|-----|-----|-----|-----|-----|-----|-----|-----|-----|-----|-----|-----|-----|-----|-----|-----|-----|-----|-----|-----|-----|-----|-----|-----|-----|-----|-----|-----|-----|-----|-----|-----|-----|-----|-----|-----|-----|-----|-----|-----|-----|-----|-----|-----|-----|-----|-----|-----|-----|-----|-----|-----|-----|-----|-----|-----|-----|-----|-----|-----|-----|-----|-----|-----|-----|-----|-----|-----|-----|-----|-----|-----|-----|-----|-----|-----|-----|-----|-----|-----|-----|-----|-----|-----|-----|-----|-----|-----|-----|-----|-----|-----|-----|-----|-----|-----|-----|-----|-----|-----|-----|-----|-----|-----|-----|-----|-----|-----|-----|-----|-----|-----|-----|-----|-----|-----|-----|-----|-----|-----|-----|-----|-----|-----|-----|-----|-----|-----|-----|-----|-----|-----|-----|-----|-----|-----|-----|-----|-----|-----|-----|-----|-----|-----|-----|-----|-----|-----|-----|-----|-----|-----|-----|-----|-----|-----|-----|-----|-----|-----|-----|-----|-----|-----|-----|-----|-----|-----|-----|-----|-----|-----|-----|-----|-----|-----|-----|-----|-----|-----|-----|-----|-----|-----|-----|-----|-----|-----|-----|-----|-----|-----|-----|-----|-----|-----|-----|-----|-----|-----|-----|-----|-----|-----|-----|-----|-----|-----|-----|-----|-----|-----|-----|-----|-----|-----|-----|-----|-----|-----|-----|-----|-----|-----|-----|-----|-----|-----|-----|-----|-----|-----|-----|-----|-----|-----|-----|-----|-----|-----|-----|-----|-----|-----|-----|-----|-----|-----|-----|-----|-----|-----|-----|-----|-----|-----|-----|-----|-----|-----|-----|-----|-----|-----|-----|-----|-----|-----|-----|-----|-----|-----|-----|-----|-----|-----|-----|-----|-----|-----|-----|-----|-----|-----|-----|-----|-----|-----|-----|-----|-----|-----|-----|-----|-----|-----|-----|-----|-----|-----|-----|-----|-----|-----|-----|-----|-----|-----|-----|-----|-----|-----|-----|-----|-----|-----|-----|-----|-----|-----|-----|-----|-----|-----|-----|-----|-----|-----|-----|-----|-----|-----|-----|-----|-----|-----|-----|-----|-----|-----|-----|-----|-----|-----|-----|-----|-----|-----|-----|-----|-----|-----|-----|-----|-----|-----|-----|-----|-----|-----|-----|-----|-----|-----|-----|-----|-----|-----|-----|-----|-----|-----|-----|-----|-----|-----|-----|-----|-----|-----|-----|-----|-----|-----|-----|-----|-----|-----|-----|-----|-----|-----|-----|-----|-----|-----|-----|-----|-----|-----|-----|-----|-----|-----|-----|-----|-----|-----|-----|-----|-----|-----|-----|-----|-----|-----|-----|-----|-----|-----|-----|-----|-----|-----|-----|-----|-----|-----|-----|-----|-----|-----|-----|-----|-----|-----|-----|-----|-----|-----|-----|-----|-----|-----|-----|-----|-----|-----|-----|-----|-----|-----|-----|-----|-----|-----|-----|-----|-----|-----|-----|-----|-----|-----|-----|-----|-----|-----|-----|-----|-----|-----|-----|-----|-----|-----|-----|-----|-----|-----|-----|-----|-----|-----|-----|-----|-----|-----|-----|-----|-----|-----|-----|-----|-----|-----|-----|-----|-----|-----|-----|-----|-----|-----|-----|-----|-----|-----|-----|-----|-----|-----|-----|-----|-----|-----|-----|-----|-----|-----|-----|-----|-----|-----|-----|-----|-----|-----|-----|-----|-----|-----|-----|-----|-----|-----|-----|-----|-----|-----|-----|-----|-----|-----|-----|-----|-----|-----|-----|-----|-----|-----|-----|-----|-----|-----|-----|-----|-----|-----|-----|-----|-----|-----|-----|-----|-----|-----|-----|-----|-----|-----|-----|-----|-----|-----|-----|-----|-----|-----|-----|-----|-----|-----|-----|-----|-----|-----|-----|-----|-----|-----|-----|-----|-----|-----|-----|-----|-----|-----|-----|-----|-----|-----|-----|-----|-----|-----|-----|-----|-----|-----|-----|-----|-----|-----|-----|-----|-----|-----|-----|-----|-----|-----|-----|-----|-----|-----|-----|-----|-----|-----|-----|-----|-----|-----|-----|-----|-----|-----|-----|-----|-----|-----|-----|-----|-----|-----|-----|-----|-----|-----|-----|-----|-----|-----|-----|-----|-----|-----|-----|-----|-----|-----|-----|-----|-----|-----|-----|-----|-----|-----|-----|-----|-----|-----|-----|-----|-----|-----|-----|-----|-----|-----|-----|-----|-----|-----|-----|-----|-----|-----|-----|-----|-----|-----|-----|-----|-----|-----|-----|-----|-----|-----|-----|-----|-----|-----|-----|-----|-----|-----|-----|-----|-----|-----|-----|-----|-----|-----|-----|-----|-----|-----|-----|-----|-----|-----|-----|-----|-----|-----|-----|-----|-----|-----|-----|-----|-----|-----|-----|-----|-----|-----|-----|-----|-----|-----|-----|-----|-----|-----|-----|-----|-----|-----|-----|-----|-----|-----|-----|-----|-----|-----|-----|-----|-----|-----|-----|-----|-----|-----|-----|-----|-----|-----|-----|-----|-----|-----|-----|-----|-----|-----|-----|-----|-----|-----|-----|-----|-----|-----|-----|-----|-----|-----|-----|-----|-----|-----|-----|-----|-----|-----|-----|-----|-----|-----|-----|-----|-----|-----|-----|-----|-----|-----|-----|-----|-----|------|

# "Gamadviridae" MCP

```

gamad_group_MCF
Ga0307485_10018275_4
gamad_contig_30_3
Ga0211828_10000821_18
gamad_contig_26_24
gamad_contig_14_14
Ga0454524_002560_10
gamad_contig_31_3
gamad_contig_17_15
gamad_contig_5_17
gamad_contig_11_11
Ga0355524_0001654_9
gamad_contig_18_45
Ga0210344_10001004_20
gamad_contig_18_45
Ga0352065_0490_10
Ga0119411_10000525_25
Ga0213515_10005687_14
Ga0119388_1000897_17
gamad_contig_2_25
Ga0307485_10001075_4
Ga0205648_1000744_12
gamad_contig_24_24
gamad_contig_28_3
Ga0197215_1000275_2

```

mp q q NppjIall In 42Ifil GvPtenEq e d qn a c t 5 Gpaalllcp d l

```

gamad_group_MCF
Ga0307485_10018275_4
gamad_contig_30_3
Ga0211828_10000821_18
gamad_contig_26_24
gamad_contig_14_14
Ga0454524_002560_10
gamad_contig_31_3
gamad_contig_11_11
Ga0355524_0001654_9
gamad_contig_18_45
Ga0210344_10001004_20
gamad_contig_18_45
Ga0352065_0490_10
Ga0119411_10000525_25
Ga0213515_10005687_14
Ga0119388_1000897_17
gamad_contig_2_25
Ga0307485_10001075_4
Ga0205648_1000744_12
gamad_contig_24_24
gamad_contig_28_3
Ga0197215_1000275_2

```

1 6E1 Ehbh a EfaGcaat n dze c4 q el

1 chs h 3E2EA em Evtalkc

1aIh8e ee 6P

```

gamad_group_MCF
Ga0307485_10018275_4
gamad_contig_30_3
Ga0211828_10000821_18
gamad_contig_26_24
gamad_contig_14_14
Ga0454524_002560_10
gamad_contig_31_3
gamad_contig_17_15
gamad_contig_5_17
gamad_contig_11_11
Ga0355524_0001654_9
gamad_contig_18_45
Ga0210344_10001004_20
gamad_contig_18_45
Ga0352065_0490_10
Ga0119411_10000525_25
Ga0213515_10005687_14
Ga0119388_1000897_17
gamad_contig_2_25
Ga0307485_10001075_4
Ga0205648_1000744_12
gamad_contig_24_24
gamad_contig_28_3
Ga0197215_1000275_2

```

4 3 5 g

pn

1 eNq 9H e Gc ye a p h n

1 i v ff q pF nG c hE2Vv8A 1

1c

NW1 146Gpat 3Efa

HHpred search initiated from both MCP alignments brings mimi-, irido-, asco-, and phycodnavirus MCP with high confidence.

2 409

| Nr                       | Hit | Name                                                                                                                            | Probability | E-value | Score  | SS   | Aligned cols | Target Length |
|--------------------------|-----|---------------------------------------------------------------------------------------------------------------------------------|-------------|---------|--------|------|--------------|---------------|
| <input type="checkbox"/> | 1   | Q716X4 CAPS2_MIMIV Probable capsid protein 2 OS=Acanthamoeba polyphaga mimivirus OX=212035 GN=MIML_R439 PE=3 SV=2               | 100         | 2e-74   | 585.41 | 34.7 | 395          | 591           |
| <input type="checkbox"/> | 2   | 8H2L_bx MCPV1; giant virus, nucleocytoplasmic large DNA viruses (NCLDVs), viral assembly, Paramecium bursaria chlorella virus 1 | 100         | 2.6e-73 | 573.31 | 37   | 397          | 520           |
| <input type="checkbox"/> | 3   | 8RBT_O Major capsid protein; cryo-EM, subtomogram averaging, EhV-201, enveloped virus, capsid, major capsid protein, VIRUS; 12. | 100         | 1.3e-72 | 565.58 | 39.1 | 390          | 496           |
| <input type="checkbox"/> | 4   | 8H2L_bc MCPV2; giant virus, nucleocytoplasmic large DNA viruses (NCLDVs), viral assembly, Paramecium bursaria chlorella virus 1 | 100         | 6.9e-73 | 560.36 | 35.9 | 379          | 486           |
| <input type="checkbox"/> | 5   | Q716Y5 CAPS4_MIMIV Probable capsid protein 4 OS=Acanthamoeba polyphaga mimivirus OX=212035 GN=MIML_R441 PE=3 SV=2               | 100         | 5.7e-73 | 567.88 | 34   | 391          | 512           |
| <input type="checkbox"/> | 6   | O39164 MCP_IRV16 Major capsid protein OS=Costelytra zealandica iridescent virus OX=68348 GN=MCP PE=3 SV=1                       | 100         | 1.1e-72 | 563.02 | 33.3 | 391          | 462           |
| <input type="checkbox"/> | 7   | A4KXB1 CAPSD_HVAVE Major capsid protein OS=Heliothis virescens ascovirus 3e OX=260797 GN=MCP PE=3 SV=1                          | 100         | 9.5e-73 | 561.7  | 32.3 | 391          | 455           |

3 553

| Nr                       | Hit | Name                                                                                                                            | Probability | E-value | Score  | SS   | Aligned cols | Target Length |
|--------------------------|-----|---------------------------------------------------------------------------------------------------------------------------------|-------------|---------|--------|------|--------------|---------------|
| <input type="checkbox"/> | 1   | Q716X4 CAPS2_MIMIV Probable capsid protein 2 OS=Acanthamoeba polyphaga mimivirus OX=212035 GN=MIML_R439 PE=3 SV=2               | 100         | 1.3e-77 | 669.27 | 40.4 | 419          | 591           |
| <input type="checkbox"/> | 2   | Q716Y5 CAPS4_MIMIV Probable capsid protein 4 OS=Acanthamoeba polyphaga mimivirus OX=212035 GN=MIML_R441 PE=3 SV=2               | 100         | 1.9e-76 | 651.33 | 44.5 | 425          | 512           |
| <input type="checkbox"/> | 3   | O39164 MCP_IRV16 Major capsid protein OS=Costelytra zealandica iridescent virus OX=68348 GN=MCP PE=3 SV=1                       | 100         | 3e-76   | 643.72 | 44.8 | 434          | 462           |
| <input type="checkbox"/> | 4   | 8H2L_bx MCPV1; giant virus, nucleocytoplasmic large DNA viruses (NCLDVs), viral assembly, Paramecium bursaria chlorella virus 1 | 100         | 5.4e-76 | 650.01 | 45.8 | 408          | 520           |
| <input type="checkbox"/> | 5   | STIP_B Major capsid protein; VIRAL PROTEIN; HET: 7CV, XYP, FUC, BGC, RM4, MAN, XXR, GLA; 2.0A {Paramecium bursaria Chlorella vi | 100         | 7.3e-76 | 636.15 | 42.6 | 378          | 436           |
| <input type="checkbox"/> | 6   | A4KXB1 CAPSD_HVAVE Major capsid protein OS=Heliothis virescens ascovirus 3e OX=260797 GN=MCP PE=3 SV=1                          | 100         | 1.4e-75 | 637.32 | 44.6 | 411          | 455           |
| <input type="checkbox"/> | 7   | P22176 MCP_LCDV1 Major capsid protein OS=Lymphocystis disease virus 1 (isolate Darai) OX=654922 GN=MCP PE=3 SV=2                | 100         | 9.2e-76 | 639.42 | 43.3 | 404          | 459           |

*top HHpred hits for Yaraviridae (left) and “Gamadviridae” (right) MCP alignments*



```

Ple1b@KY203336_16      : MGKRLIHTNACFFVCGTGFPLDRKVS-CYVWR-----N-----NKLLKVVWENWESVLRHAKYMHHTLK--S--MNEDEV--AMYSYVINIVG-C-----D-----KND  F-HFNE  EH-----TISSINDH-----MUNAQR-----HE-
Ple2@KY346835_13      : MGKRQLH-GGVHYCGTSGFAT-PRKV-CYVWR-----G-----ERLIRVWVWENWESVVRHAYHIAE-HG--DAALPAFDL--QRTLQHVKEITH-V-----L-----PDA  F-HYTH  KH-----NNLFDA-----YYVGS-----LN-
Ga0181424_10000048_2  : -----M-RASL-CYVFK-----G-----DKLCKRSTCWEAVIRHARDQCYG-QG--D--IDVDAL--AMQEHVDAIVG-S-----S-----VGE  F-HNDR  SW-----AKALDVNT-----LTAAS-----FK-
Ga0494180_0000023_17  : -----M-NTSC-CSVYA-----L--D--GRTGKPTVWENWESVVRHARDWCD-DG--D--IDSEF--NRVSAVCEKIG-L-T-S-----S-----FNTEA  F-HYTE  TH-----GGR-----MNDIQ-----HS-
Ga0209966_1000066_26  : MGKRKIK-DIVYVCGTGMFM-RNSN-CYVYS-----V--A--GKLLKESVWENWESVLRHAKYMHHTLK--S--MNEDEV--AMYSYVINIVG-C-----D-----KND  F-HFNE  EH-----TISSINDH-----MUNAQR-----HE-
Ga0211699_10000211_12  : MGKRKIL-NRCYVCGTGAM-GSPN-AYVFK-----N-----GKTIKESVWENWESVVRHARELVK-QG--A--MTAEQA--YBNQHVLEMTG-G-V-A-----A-----PFEELHYAN  F-H  DB-----GGD-----LSNHA-----LN-
Ga0211564_10000112_24  : MGKRKIL-KASYVCGTGFFL-RNSC-CYVWF-----N-----EGEKREGKLIKESVWENWESVVRHATMLLK-EG--V--ITPEQH--GDLEVIHEITG-S-S-Y-----Y-----RF  F-PYEC  CH-----KGT-----MNEE-----HR-
Ga0494542_000028_10   : MGKRKIL-GEAFYVCGTGFFM-RQAY-CYVWD-----A--A--GKLVKESVWENWESVLRHAA-----M--THYEEY--DRKAHIVSITG-T-D-R-----R-----RV  F-DYTE  YH-----MKG-----H-----MTHFG-----HM-
Ga0494229_04493_40    : MGKRKIL-NETYYVCGTGFFM-RSSN-CYVWNN-----D--GKLGKLESVWENWESVLRHACVYK-E-----QPEEL--AKKEHIKERVG-G-V-H-----H-----EE  F-HYCE  EH-----AGGEN--S-----YTAAC-----HN-
Ga0105092_10000132_27  : MFSVUV-KKRLRIGTGGHVLKGGQD-SFCDKKS-----K--N--GTISWGRCAVDCAIAGLKEESDRK-----LSPEDH--DRVNRFRSLY-R-K-----DAGKPFSEKPVV  F-S  A--PNVGL  RY-----GGPDT-----MGPEE-----RK-
Ga0498922_0001740_3   : MCTCVH-NRKFVIDTGESI-DSNK-KFKDKR-----G--KLVKVCCTGTFSTGLAGLTYITRNF-N--ISKDES--DRFGVYQSSLV-K-C-----D--PEERYPHF  F-NS  F--PFTL  TG-----GGK-----TSLET-----HN-
Flavob@FAL001000034_37  : MGKRKIL-DITYVCGTGLFM-RTTN-CYVWNH-----E--TGKLLKESVWENWESVVRHAIQYKIGS--SSATDPKN--KRMCHITELVG-T-----S-----SA  F-HWKR  RWMG-----GKESDEL-----ST-IDSAN-----LA-
Verruc@NZE01000048_26  : MGKRKIL-GTSFYVCGTGFFM-RSAH-FKWSNS-----S--T--GKLEKESVWENWESVVRHATQQAEL-----ITQEEL--DRMEHIEGITG-T-V-----V-----EP  F-HYEE  AH-----TKR-----MSAQD-----HN-
Fates@JAHIZF010000067_15  : NMITVID-GKKYRTGTEVF-GHAF-FKHSRE-----F--LKG--WVVTGCPVCLRAMIDLHPTGPKNEVLTERR--SELDQLQHSIR-R-T--E--FKSNVRF  F-KA  F--KDDL  KR-----AKEGNFA-----LWDE-----KA-
gamad_contig_1_4      : MGKRKIL-GQVYVCGTAYFM-RQAY-CYVSWN-----G--DKLVKESVWENWESVVRHAGHLFR-EG--D--VSEQL--NDMAHINSQAG-F-----I-----DPS  F-RCHYS  F  EH-----AFVGHGN-----IHNYNAD-----MA-
gamad_contig_24_43    : MGKRKIL-GHTYYVCGTGYFM-RQSN-CYVWNH-----AAGGGG--ARLLKESVWENWESVLRHARHRHEVK--A--ISEEEL--ARREYVEQVCG-V-A--F-----F-----DDA  F-CYHFS  F  EH-----REAEERKRVADLFRNWSMEE-----HA-
gamad_contig_2_14     : -----M-RNPN-CYVNS-----E--E--GKLLKESVWENWESVLRHAKHLSS-----ELSTDY--QRREYVIRTGQ-D-C--S-----S-----NE  F-HFTD  EH-----KGNHSKS-----LNARE-----HR-
Yara_contig_14_9      : MWNVLH-GRRYVCGCANVRETDK-IYKIEID-----A--D--GKVENKESVWENWESVVRHAKYMHHTLK--S--MNEDEV--AMYSYVINIVG-C-----D-----KND  F-HFNE  EH-----TISSINDH-----MUNAQR-----HE-
Acanth_polyphaga_roumouvirus@Y  : DGNKINL-KRTNIKDRHEF-DNLF-FKELY-----H--N--GYVVLGTFSPNCALRNHLNIRDK-----MYERR--SLFRMYREMGH--LSADDLID-----L-----KE  F-PWEL  ES-----GGN-----MSITT-----RN-
Bodo_saltans_virus@YF_01077821  : DSNKFTF-NKSEFANWCTCFE-DNAP-IFEKY-----Q--A--GVYVFNREDECSLSYLLKDEHNI-----TMRR--SLVNMHREYGFSPRT-----R-----RM  F-PKEI  EK-----GGF-----KTIQD-----RE-
Namac_virus@AXN90943   : RTGEYK-ESTDLNCCHSF-KTVF-CFKL-----I--D--QTFYVCGSLNCVLSYVLDIGDYV-----YSRT--TLNVKQEIYGSNCY-S-----S-----CF  F-PRHA  EK-----GGY-----LSIQD-----RN-
Mimivirus_LChIA02@QBK99012  : NGERIII-SMTDIAWCTYKF-STHF-CFKFK-----M--N--KYYVDFGSECAARNNLMDLNDK-----SADRA--SLKILYNIRYV-V-----F-----KF  F-AREV  EK-----GGV-----LTIKQ-----RK-
Tetraselms_virus_1@YF_0107833  : -----C-MSTSVWCTCFE-DNDF-IFVKY-----FNT--E--DGTYVCGSISCAARNNLASRESND--TVGERH--SLCSSLRMLHG-T-D--K-----K-----RV  F-NKRS  GK-----GGC-----MSIQD-----RC-
Phaeocystis_globosa_virus@YF_0  : YNLKHNH-ITNRSFCTCFE-DNDF-IFRHE-----R--D--GVHCVCGSEPCACSYMLNDSIDNS-----SKFERL--ALNNYKGYNYNKNK-----L-----NF  F-SPYIL  NK-----YGN-----LDIQD-----RK-
Ostreococcus_lucimarinus_virus  : F-LSYKRPNCHCAHFF-EGVF-IFVSR-----DDR--R--SKFYTA--NWSGKINSHADIFGCVK-----GGTC--CMMMRKMYN--CIG--S-----S-----KC  F-NRFK  RE-----GGC-----MTIEE-----RE-
Yellowstone_lake_phycodnavirus  : MDDGLA--CVHFI--PCLEPFI--VKH-----DEK--T--NKFITR--NWSQCAKRNALDNNTSRS-----GETQ--MDMMRRRAFG--KYT--F-----F-----NF  F-KREA  KI-----GGT-----MTIEE-----RSF-
Ectocarpus_siliculosus_virus_1  : F-LSYKRPNCHCAHFF-EGVF-IFVSR-----DDL--R--HUYCEP--NWSQCAKRNMRTPSPAG-----RGNRN--MYVSLAYKTIW--KLKRSVIDIETKRMRTYCYF--RP--A--PRAK  CE-----GGE-----MSIEE-----RKD-
Feldmannia_irregularis_virus_a  : F-RRTSE--NHCCHFF-EGVF-IFVYF-----DER--K--QVYCS--NWSQCAKRNALDHPVSSG-----RGNRN--MYVSLAYKTIW--KLKRSVIDIETKRMRTYCYF--RP--A--PRAK  CE-----GGE-----MSIEE-----RKD-
Pandoravirus_dulcis@YF_0083150  : VYRNILD-IRASGPNHCCHFF-EGVF-IFVYF-----DSR--T--RYAVK--NWSQCAKRNALDHPVSSG-----RGNRN--MYVSLAYKTIW--KLKRSVIDIETKRMRTYCYF--RP--A--PRAK  CE-----GGE-----MSIEE-----RKD-
Acanth_castellanii_wedusavirus  : -----SVGRHPN--DLGEF--EGLE-IF--TRH-----LPR--T--DQYVVR--NWSQCAKRNALDHPVSSG-----RGNRN--MYVSLAYKTIW--KLKRSVIDIETKRMRTYCYF--RP--A--PRAK  CE-----GGE-----MSIEE-----RKD-
Pithovirus_ICPAC104@QBK90635  : FRDEKSK-EMSSCIDHCRKEV-INSK-IF--LSM-----NKLDNR--K--YFYVYV--NWSQCAKRNALDHPVSSG-----RGNRN--MYVSLAYKTIW--KLKRSVIDIETKRMRTYCYF--RP--A--PRAK  CE-----GGE-----MSIEE-----RKD-
Lymphocystis_disease_virus@YF  : -----MMR--CTLEL--NLKF--KCC--LRK-----E--G--SELLTI--NWSQCAKRNALDHPVSSG-----RGNRN--MYVSLAYKTIW--KLKRSVIDIETKRMRTYCYF--RP--A--PRAK  CE-----GGE-----MSIEE-----RKD-
Brazilian_marshellievirus@YF_00  : VSGVILP-IHTDIF--CRQCF-DNSF-IF--LRFVKKHRETGLAERMNEHLPLNLPDTHG-----N--HFETE--N--SFGCKV--NWSQCAKRNALDHPVSSG-----RGNRN--MYVSLAYKTIW--KLKRSVIDIETKRMRTYCYF--RP--A--PRAK  CE-----GGE-----MSIEE-----RKD-
Tokyovirus_A1@YF_009255018  : FLP-LTDFE--NCRFF-HTMC-YA--LRYVKKHRETGLAERMNEHLPLNLPDTHG-----N--HFETE--N--SFGCKV--NWSQCAKRNALDHPVSSG-----RGNRN--MYVSLAYKTIW--KLKRSVIDIETKRMRTYCYF--RP--A--PRAK  CE-----GGE-----MSIEE-----RKD-
Monkeypox_virus@XFF53929  : IKT-NSVIDK--CRQCF-DNSF-IF--ETFK-----G--E--V--SFKICRDLASMYKSHVA-----LREE--FK--SLLFLVYE-----L-----DKR  FN-----L-----INNL-----RX-
Canarypox_virus@NF_95092  : LHI-KKDNH--CRQCF-NSHTYF--KTLY-----G--D--DI--SFKICRDLASMYKSHVA-----LREE--FK--SLLFLVYE-----L-----DKR  FN-----L-----INNL-----RX-
Crp_virus@ARP95171  : LAL-RAADGT--CRQCF-GTAA-LA--ETLD-----G--G--AV--SFKICRDLASMYKSHVA-----LREE--FK--SLLFLVYE-----L-----DKR  FN-----L-----INNL-----RX-
Salmon_gill_poxvirus@YF_009162  : -----NNSKTI--ITGNDI--GLV--YK--ETLF-----E--G--KI--SFKICRDLASMYKSHVA-----LREE--FK--SLLFLVYE-----L-----DKR  FN-----L-----INNL-----RX-

```

c

p

g

sc

a



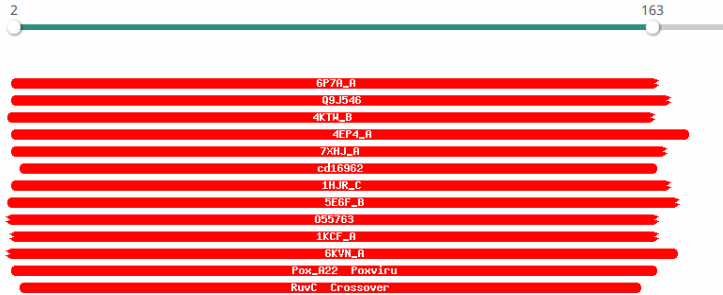

| Nr                       | Hit | Name    | Probability                                                                                                              | E-value | Score   | SS     | Aligned cols | Target Length |     |
|--------------------------|-----|---------|--------------------------------------------------------------------------------------------------------------------------|---------|---------|--------|--------------|---------------|-----|
| <input type="checkbox"/> | 1   | 6P7A_A  | Holliday junction resolvase; RESOLVASE, HYDROLASE; 3.081A (Fowlpox virus)                                                | 99.78   | 4.2e-17 | 115.02 | 14.9         | 138           | 148 |
| <input type="checkbox"/> | 2   | Q9J546  | RUVV_FOWPN Holliday junction resolvase OS=Fowlpox virus (strain NVSL) OX=928301 GN=FPV187 PE=1 SV=1                      | 99.78   | 2.2e-17 | 117.98 | 13.3         | 145           | 156 |
| <input type="checkbox"/> | 3   | 4KTW_B  | RuvC endonuclease; endonuclease, DNA junctions, replication, recombination, phage packaging, Holliday junction, RNase-H  | 99.77   | 5.9e-17 | 116.12 | 15.1         | 141           | 161 |
| <input type="checkbox"/> | 4   | 4EP4_A  | Crossover junction endodeoxyribonuclease RuvC; resolvase, Hydrolase; 1.28A (Thermus thermophilus) SCOP: c.55.3.6         | 99.75   | 1.4e-16 | 114.2  | 14.3         | 148           | 166 |
| <input type="checkbox"/> | 5   | 7XHJ_A  | Crossover junction endodeoxyribonuclease RuvC; nuclease, DNA repair, Homologous recombination, Holliday junction resolu  | 99.74   | 3e-16   | 114.34 | 13.9         | 140           | 179 |
| <input type="checkbox"/> | 6   | cd16962 | RuvC; Crossover junction endodeoxyribonuclease RuvC. Crossover junction endodeoxyribonuclease RuvC is also called Hollid | 99.73   | 4e-16   | 110.27 | 14.1         | 138           | 156 |
| <input type="checkbox"/> | 7   | 1HJR_C  | HOLLIDAY JUNCTION RESOLVASE (RUVC); SITE-SPECIFIC RECOMBINASE; 2.5A (Escherichia coli) SCOP: c.55.3.6                    | 99.73   | 2.6e-16 | 111.81 | 12.8         | 141           | 158 |
| <input type="checkbox"/> | 8   | 5E6F_B  | CNPV261 Holliday junction resolvase protein; Poxvirus, Resolvase, Holliday Junction, Metal-binding, VIRAL PROTEIN; HET:  | 99.73   | 1.7e-15 | 107.76 | 16.7         | 146           | 152 |

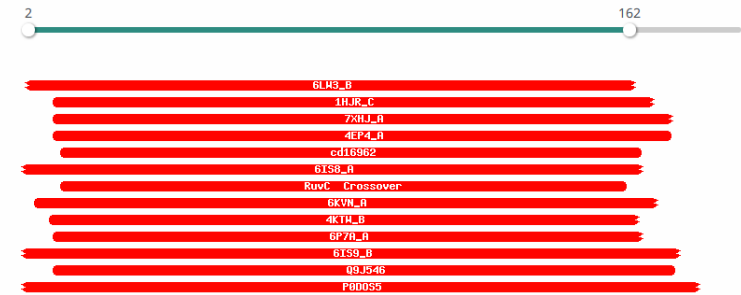

| Nr                       | Hit | Name       | Probability                                                                                                              | E-value | Score   | SS     | Aligned cols | Target Length |     |
|--------------------------|-----|------------|--------------------------------------------------------------------------------------------------------------------------|---------|---------|--------|--------------|---------------|-----|
| <input type="checkbox"/> | 1   | 6LW3_B     | Crossover junction endodeoxyribonuclease RuvC; Holliday junction resolvase RuvC Endonuclease, DNA BINDING PROTEIN; 2.38A | 99.68   | 1.4e-14 | 101.5  | 16           | 147           | 163 |
| <input type="checkbox"/> | 2   | 1HJR_C     | HOLLIDAY JUNCTION RESOLVASE (RUVC); SITE-SPECIFIC RECOMBINASE; 2.5A (Escherichia coli) SCOP: c.55.3.6                    | 99.68   | 1.4e-14 | 101.01 | 15.7         | 145           | 158 |
| <input type="checkbox"/> | 3   | 7XHJ_A     | Crossover junction endodeoxyribonuclease RuvC; nuclease, DNA repair, Homologous recombination, Holliday junction resolu  | 99.67   | 1.9e-14 | 102.89 | 16           | 151           | 179 |
| <input type="checkbox"/> | 4   | 4EP4_A     | Crossover junction endodeoxyribonuclease RuvC; resolvase, Hydrolase; 1.28A (Thermus thermophilus) SCOP: c.55.3.6         | 99.65   | 7.1e-14 | 98.46  | 16.8         | 152           | 166 |
| <input type="checkbox"/> | 5   | cd16962    | RuvC; Crossover junction endodeoxyribonuclease RuvC. Crossover junction endodeoxyribonuclease RuvC is also called Hollid | 99.65   | 5e-14   | 97.77  | 15.4         | 142           | 156 |
| <input type="checkbox"/> | 6   | 6IS8_A     | Monokaryotic chloroplast 1; Holliday junction resolvase-DNA complex, DNA BINDING PROTEIN-DNA complex; HET: 1PE, 1.68A (Z | 99.61   | 1.1e-13 | 98.5   | 14.5         | 151           | 174 |
| <input type="checkbox"/> | 7   | PF02075.21 | ; RuvC; Crossover junction endodeoxyribonuclease RuvC                                                                    | 99.6    | 1.8e-13 | 94.57  | 14.4         | 137           | 148 |
| <input type="checkbox"/> | 8   | 6KVN_A     | NtMOC1; chloroplast, resolvase, PLANT PROTEIN; 2.02A (Nicotiana tabacum)                                                 | 99.6    | 2.7e-13 | 96.23  | 15.3         | 150           | 171 |

top HHpred hits for “Gamadviridae” (right) and Yaraviridae (left) RuvC alignments

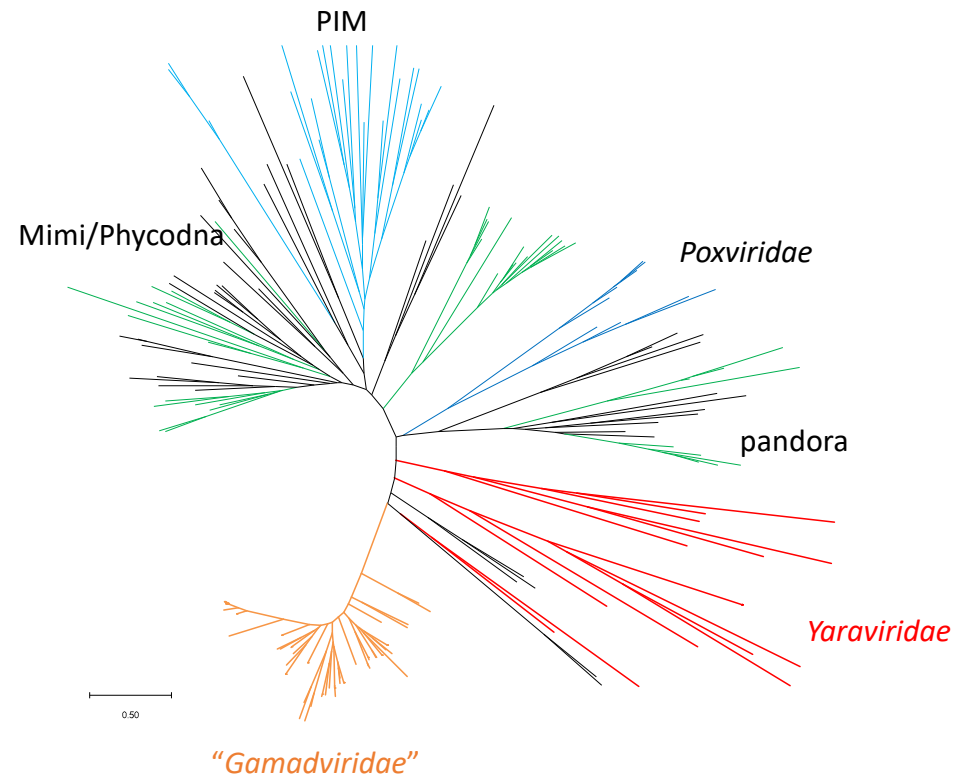





# SF3\_hel1 (Yaravirus gene 69)

Bacteria, phages

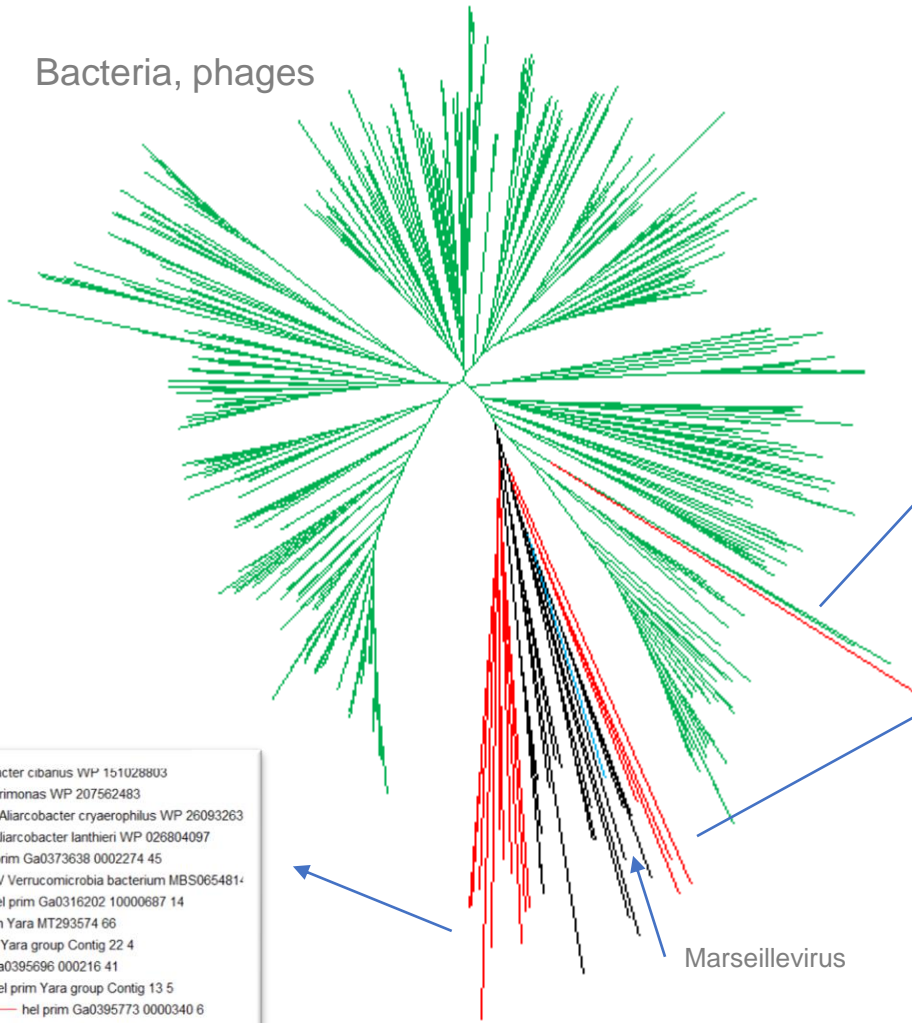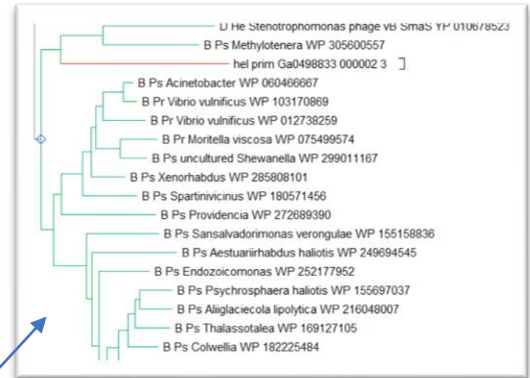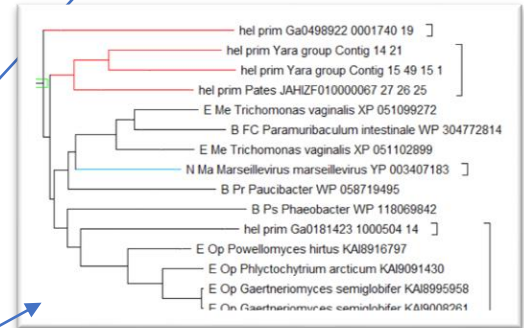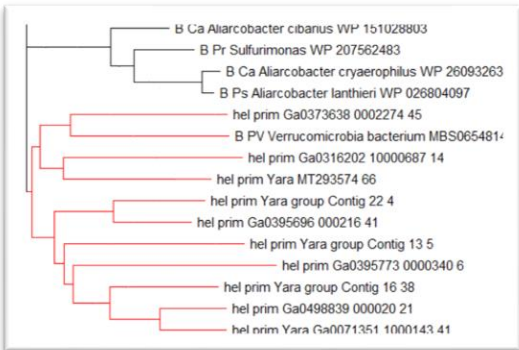

Marseillevirus

Yaraviridae



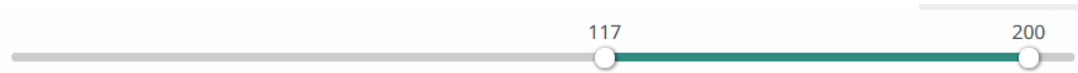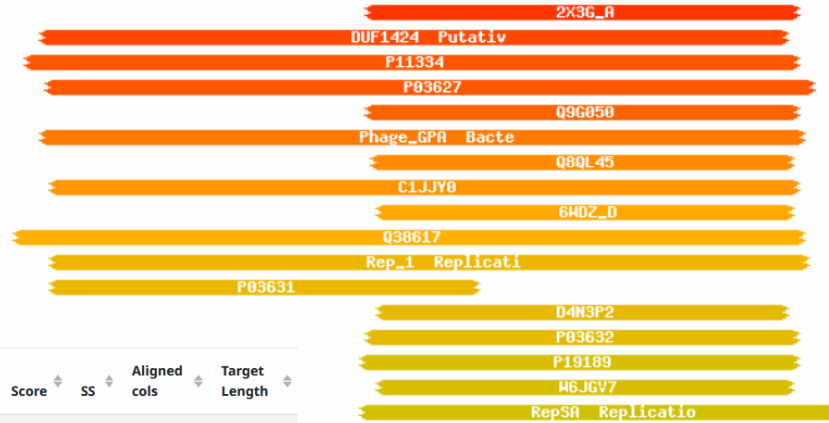

| Nr                       | Hit | Name       | Probability                                                                                                              | E-value | Score | SS    | Aligned cols | Target Length |     |
|--------------------------|-----|------------|--------------------------------------------------------------------------------------------------------------------------|---------|-------|-------|--------------|---------------|-----|
| <input type="checkbox"/> | 1   | 2X3G_A     | SIRV1 HYPOTHETICAL PROTEIN ORF119; VIRAL PROTEIN, HOST MEMBRANE; HET: MSE; 1.8A (SULFOLOBUS ISLANDICUS RUDIVIRUS 1 VARIA | 95.52   | 0.097 | 42.87 | 6            | 65            | 119 |
| <input type="checkbox"/> | 2   | PF07232.14 | ; DUF1424; Putative rep protein (DUF1424)                                                                                | 93.77   | 6.8   | 36.39 | 13.8         | 115           | 316 |
| <input type="checkbox"/> | 3   | P11334     | REP_SPV4 Replication-associated protein ORF2 OS=Spiroplasma virus 4 OX=10855 GN=ORF2 PE=3 SV=1                           | 92.74   | 3.1   | 39.96 | 10.4         | 107           | 320 |
| <input type="checkbox"/> | 4   | P03627     | REP_BPPF3 Replication-associated protein G2P OS=Pseudomonas phage Pf3 OX=10872 GN=II PE=3 SV=1                           | 92.66   | 8.1   | 36.1  | 12.6         | 109           | 278 |
| <input type="checkbox"/> | 5   | Q9G050     | REP_BPPHM Replication-associated protein VP4 OS=Bdellovibrio phage phiMH2K OX=145579 GN=ORF4 PE=3 SV=1                   | 91.61   | 1.4   | 42.09 | 6.8          | 67            | 315 |
| <input type="checkbox"/> | 6   | PF05840.16 | ; Phage_GPA; Bacteriophage replication gene A protein (GPA)                                                              | 89.69   | 12    | 35.26 | 10.7         | 119           | 316 |
| <input type="checkbox"/> | 7   | Q8QL45     | Y117_SIRV1 Uncharacterized protein 117 OS=Sulfolobus islandicus rod-shaped virus 1 OX=157898 GN=117 PE=4 SV=1            | 88.17   | 2.8   | 35.65 | 5.1          | 63            | 117 |







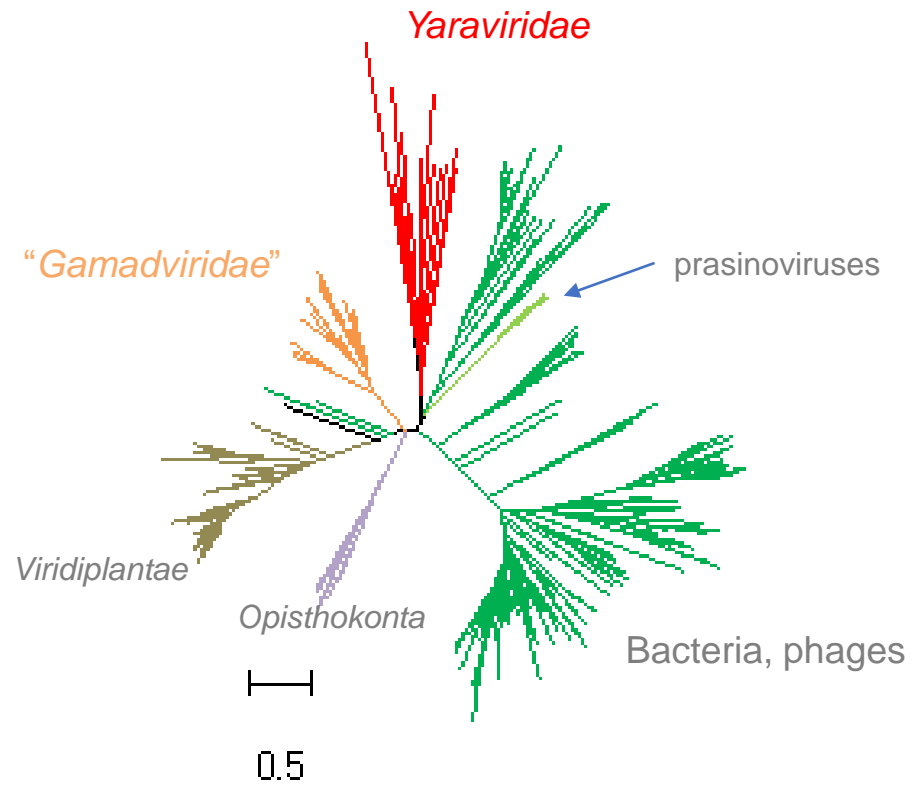



A

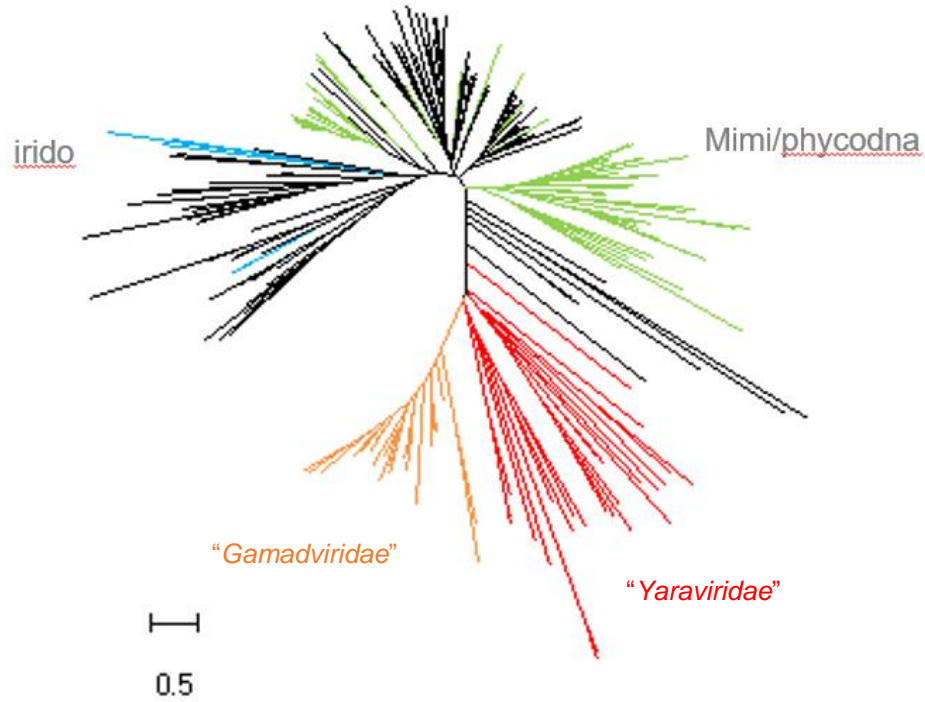

B

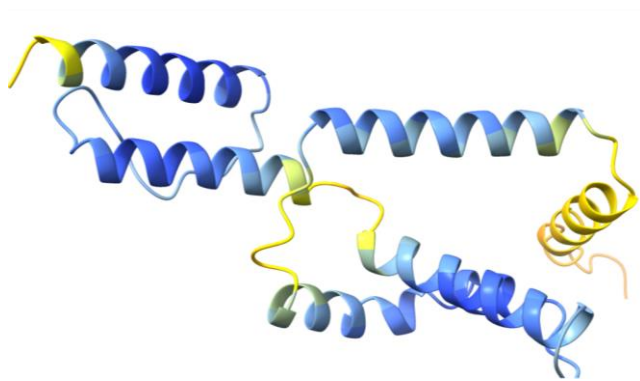

gene48 (Ple2@KY346835\_19)

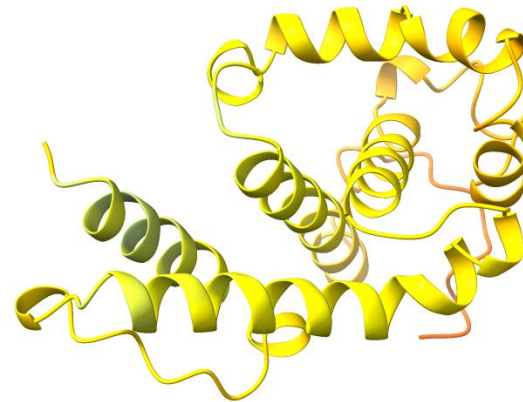

(Yaravirus)



```

gene50_nr_consensus : -----MMMFMM-RNNPLMMAIIIIYLLIIFAIYYLK-SFME-NE-DCSIEEGGIGHK-----NKIIIFPFWVAIIILAIISLIFV-
B_Ba_Fatescibacteria_group@MBDU0706664 : -----GLD-NVSPVFRGATAGVILAVSTIK-SFMD-DD-ESSEPLVSTIAGKEE-----ESALIFWVPGVFGFVGGLLI-
N_Ph_Pyramimonas_orientalis_virus@CCI90441 : -----MFA-VNKRLLISIMFIIITMLLITLIR-PILNQNCDTIEEGIGET-----KHIIYSLGGFWIICHLVYVLF-
N_eM_Catovirus_CTV1@ARF09377 : -----M-PYSPAFSALIIIIYIIIIILVLMMLK-DFLDHCKNKFFDFGFTQG-----KSVFTLLVGGIISLIFLNFV-
u_Ya_Yasminevirus_sp_GU_2018@VBB18307 : -----MLLN-IDNPVYNTIIVFSIIMLLITTK-SEVVDNEKHEFFCGTTDD-----KILLIFPFWVGLLAILVWFF-
N_eM_Edafosvirus@AYV78907 : -----MSTIFD-PYKPAYNTIIVVYIIIIILITK-SGFM-DSVNNKFFICGCKDKG-----CHLLEPFLICITCGIIVYLLF-
N_eM_Indivirus_ILV1@ARF09426 : -----MIF-GTSPVYNAILFMIIFLIILLVVK-DIIMNNTKTKFSSGCKD-----GFFAFFVWVAVSVALEFFF-
V_Ba_Fadollivirus_algeromassiliense@YP_010803412 : -----MVFF-GSSPIYNTLFLYIILVTLVLIK-SFMD-CNKTKRFSSGCGEG-----CHLFCFPIVCHSWIIFMIF-
B_Pr_Magnetococcales_bacterium@MBA42803 : -----MID-PCSQLYNTIACYIIIIILFVLM-KFMA-CEKRFKFGGLEEN-----CHLFSFPIVSHCSGIIILMIF-
N_eM_Homavirus@AYV82364 : -----MDIID-PSRPLNYNTVFIILIIICILIK-SFMD-CHRSKRFSSGGLSDN-----CHLFSFPIVSHCSGIIILMIF-
B_PV_Verrucomicrobiales_bacterium@MAH34298 : -----MIQ-LNENLVAIVXVLLIASVIXECK-DLMSKE-DCSFSSEGVRRH-----DIPXFFVITILIGTIVYGLL-
u_Vi_Virus_NIOZ_U0159@QPI16780 : -----MFSRRIITLVYIIVLIVAIIFMTQ-VYIMDD-DSNM-REGYKID-----DETITVIVLVLPLLAILITV-
V_Ba_Tetraselmis_virus_1@YP_010783191 : -----MR-NNARTWYSLTEAVTILAVVFK-KFIDRE-DCILYFGLGPD-----KSVFSEFGVVAFIATISS-
V_Ba_Mimiviridae_sp_ChoanoV1@QDY51765 : -----MELNE-LRNLYLITFLYIIVVISVLYFK-KFLIKRNTKHFVGGTGSK-----NNKIIIFELVILITSMIVVSMI-
B_Pr_Alphaproteobacteria_bacterium@NDB84211 : -----MIGELF-RRNHLINTVSAFLMMFAIFYLK-LSIAGGP-NSTIPFGVCKR-----GSIIVFVNNWIIIFLAALSRIIV-
B_Pr_Alphaproteobacteria_bacterium@NDB81941 : -----MLLIFGDEIIMEEIL-RKNPKMMNVIYIILVSGFLYMK-SEVAGG-CQ-RVRF-PGVGKK-----ESIIIFVNNWVFAIVSIVMSV-
B_FC_Crocinitomacitaceae_bacterium@NBR14461 : -----MNLDEKPRVWMLTLYLFLVSALLYFK-AIAD-D-GKKVDEGCTGRK-----TSIIIFLNNWVIGLAVSIVLAV-
B_un_bacterium@NDG30571 : -----MQFTMLASLNEDKDPVMMTIIYIFMVSALLYFK-HALVE-GKRVDEGAGRK-----TAVIIFLNNWVIGLAVSIVLIV-
B_FC_Flammeovirgaceae_bacterium@MAE87058 : -----M-FHSPRLVAIGVYLLITFIVLYYK-KIMIKR-HKRVDEGTTNE-----KHIIIFLNNWVIGLAVSIVLIV-
B_Te_Acidimicrobiae_bacterium@MBG01367 : -----MLIE-IDRKLQTLLEFIIITMAVLYYK-LPIMS-EVKTKRITDGTGPF-----KHIIIFLNNWVIGLAVSIVLIV-
N_eM_Organic_Lake_phycodnavirus_1@ADX05840 : -----MD-MNNSFTLIVLIVLIVVFSYMK-ENIM-DNELNITFEGVGYS-----NTIIIFLNNWVIGLAVSIVLIV-
B_un_bacterium@NBI96883 : -----MLSFCFGYKVCQSAIFLILYKISEIVLE-NEFCDD-DCNILEGLNYK-----NKIIIFLNNWVIGLAVSIVLIV-
B_Pr_Gammaproteobacteria_bacterium@NDH66829 : -----MHVLIILAITIYVGLTIVLYLR-SVMEHP-GTWF-ESLNPD-----FNHNNPFWFGLWVAFSLIA-
B_un_bacterium@NBC70253 : -----MTVLLSEMVLYLFGIVVLYLR-HAIMEHP-DRWF-EGVGHG-----DTLIFLNNWVIGLAVSIVLIV-
B_un_bacterium@NBV77663 : -----MKLLVAMLYLGLIAMLYLR-LSYIQRK-DSKWF-EGIGGE-----DAPPEFVFCVWVAVSIVLIV-
B_Te_Actinobacteria_bacterium@NBR60268 : -----MRLLYSGVLYLAGIATVLTLR-SEFMSHS-DTWF-EGIGRN-----PDRYIIFLNNWVIGLAVSIVLIV-
B_FC_Flavobacteria_bacterium@NBC62022 : -----MTP-DCVWF-EGIGRN-----PETHIIFLNNWVIGLAVSIVLIV-
B_un_bacterium@NBC71200 : -----MRE-DRWF-EGIGRD-----PKNF-HIIFVFAIIVAFSIVLIV-
B_Pr_Alphaproteobacteria_bacterium@NDB86209 : -----MRRLIVAGIYIIVIAVILHFK-ETLMEQE-DCAWF-EGIGRD-----PAYIIFLNNWVIGLAVSIVLIV-
B_Te_Actinobacteria_bacterium@NBC53449 : -----MRLIVAGLYVITGIAVLLIK-ENLMEHE-DRWF-EGIGRD-----PAHFYIIFVFAIIVAFSIVLIV-
B_un_bacterium@NDE16699 : -----MAPLWLAIVYSIGLGVVHLR-HALMENE-NETWF-EGYQRE-----VGGSRVYIIFVFAIIVAFSIVLIV-
B_Te_Actinobacteria_bacterium@NET47266 : -----MHTLWLAFGYIVGIAIILFIR-HAMMREGNTWF-EGLSNK-----DTIIVFVFAIIVAFSIVLIV-
N_Ph_Chrysochromulina_ericina_virus@YP_009173359 : -----MYRPPF-KNHLIGTITMIFLIVIFMTIK-BAFLTK-ESLIE-EGLGKR-----NSIIIFLNNWVIGLAVSIVLIV-
N_eM_Phaeocystis_globosa_virus@YP_008052492 : -----MFRYSV-KNNIPLVSIILLSAIFEMFLITK-SLMSDK-NKRF-EGGLYK-----NKIIVFVFAIIVAFSIVLIV-
B_FC_Candidatus_Marinitimicrobia@MAPE7437 : -----MFTRTYV-RNNIPLVSIILLSAIFEMFLITK-SLMSDK-NKRF-EGGLYK-----NKIIVFVFAIIVAFSIVLIV-
V_Ba_Megaviridae_environmental_sample@QFG75146 : -----MLASTF-KRNYLFTTILIFLIFGVVLTIK-SFLMKK-DSVWF-EGGLYK-----HKIIIFLNNWVIGLAVSIVLIV-
V_Ba_Nucleocytoviricota@UZZ29000 : -----MNEFI-KSNIVLSSVIVEMFLPMVLIITK-SLIIENI-DTHF-EGIGYS-----KKIIVFVFAIIVAFSIVLIV-
B_Pr_Cxalobacteraceae_bacterium@NDG08413 : -----MKRRQALIPNLSLETALNMRW-SGFADR-DCSIE-EGIGTK-----KKIIFLNNWVIGLAVSIVLIV-
e_un_uncultured_Mediterranean_phage@ANS04203 : -----ILLKIKFQMNRLII-RRNINLFSIAIFITLALINYS-SEFLND-DCSIE-EGVGYR-----KKIIVFVFAIIVAFSIVLIV-
A_Ca_Candidatus_Poseidonina@MDA7463512 : -----MNNAVI-RKNINTFALLIFLISFLLNYFC-SPELANT-DCSIE-EGLGQK-----KKIIFLNNWVIGLAVSIVLIV-
B_FC_Flavobacteriaceae_bacterium@MDC1320988 : -----MNNAFI-RKHINTFSLIFLFAFLLNYTR-SGFLNK-DCSIE-EGLGHK-----KKIIVFVFAIIVAFSIVLIV-
B_FC_Flavobacteriales_bacterium@MAU36413 : -----MNNRVI-RKNITVSLIFLITVTLVLLK-SAFIEKK-DGNLRE-GIGFR-----DRIVFVFAIIVAFSIVLIV-
B_Pr_Rhodobacteraceae_bacterium@MBC67241 : -----MNNRNYI-RKNITLIIIIYALTYVLMK-SAFVNE-DCSIE-EGIGYK-----KKIIVFVFAIIVAFSIVLIV-
B_Pr_Alphaproteobacteria_bacterium@NDA90778 : -----MNSYRSYI-SRNVALSVLIFLAFIITQIGQ-SFLDRE-DCSIE-EGIGYR-----NKIIVFVFAIIVAFSIVLIV-
B_Pr_Rhodobacteraceae_bacterium@MAR51059 : -----MARHRLI-RKNITVSLIFLIVFAFYHLK-SGFLDE-NSTIE-EGGLYK-----KKIIVFVFAIIVAFSIVLIV-
B_un_bacterium@NBC70773 : -----MNAIKTLL-RNNLAGTAAIYVIVFMVQYAN-SAFVNE-DCSIE-EGIGYS-----SKIIVFVFAIIVAFSIVLIV-
B_Ba_Candidatus_Elulumicrobium@NEP58319 : -----TDIIVFMVQYMN-ITFINNE-DCSIE-EGIGYS-----SKIIVFVFAIIVAFSIVLIV-
B_FC_Bacteroidetes_bacterium@NBP65283 : -----NAIKRNI-RNNLAGSALIVIVFMVQYMN-SFVINE-DCSIE-EGIGYS-----SKIIVFVFAIIVAFSIVLIV-
A_Ea_Euryarchaeota_archaeon@RZD40573 : -----MYRSFI-RRNITSVAIVFVIFVFCVQVYA-SHFLNE-DCSIE-EGIGYK-----KKIIVFVFAIIVAFSIVLIV-
B_FC_Flavobacteriaceae_bacterium@MBF12520 : -----MYRQYI-RRNITSVAIVFVIFVFCVQVLE-SAFLEK-DCSIE-EGIGYK-----KKIIVFVFAIIVAFSIVLIV-
B_Pr_Bdellovibrionaceae_bacterium@MBN20832 : -----MYRQYI-RRNITSVAIVFVIFVFCVQVLE-SAFLEK-DCSIE-EGIGYK-----KKIIVFVFAIIVAFSIVLIV-
V_Ba_Yellowstone_lake_mimivirus@YP_009174099 : -----MSSREFM-KENITLIIIIYVFCIFLIQFTK-SAFLEK-DCSIE-EGIGYK-----TKIIFLNNWVIGLAVSIVLIV-
B_FC_Candidatus_Marinitimicrobia@MCJ7802881 : -----MNSYRSYI-SRNVALSVLIFLAFIITQIGQ-SFLDRE-DCSIE-EGIGYR-----NKIIVFVFAIIVAFSIVLIV-
u_un_Yaravirus_brasiliensis@YP_010800670 : -----EVLGFLMGTPSKRAALAFALATASVYALKT-ACFTE-EGALG-HEPDESASV-EPENK-CHLHIVVPHLACVGLLI-
E_Ha_Pavlovaes@KAJ1618628 : -----EYIFGFMGGTPTKRAALATATAICYATKT-AIFTE-KSIEG-HEPDEPSD-EPENK-CHLHIVVPHLACVGLLI-
E_Ha_Pavlovaes@KAJ1622493 : -----EYIFGFMGGTPTKRAALATATAICYATKT-AIFTE-KSIEG-HEPDEPSD-EPENK-CHLHIVVPHLACVGLLI-
E_Ha_Pavlovaes@KAJ1636553 : -----EYIFGFMGGTPTKRAALATATAICYATKT-AIFTE-KSIEG-HEPDEPSD-EPENK-CHLHIVVPHLACVGLLI-
E_Ha_Pavlovaes@KAJ1618980 : -----EYIFGFMGGTPTKRAALATATAICYATKT-AIFTE-KSIEG-HEPDEPSD-EPENK-CHLHIVVPHLACVGLLI-
E_Ha_Pavlovaes@KAJ1620103 : -----VRRAPQVTEVFGVAGTPLKRGVIGALATLICYATKW-AAFTE-HAATTE-VDPPD-ED-ELHEK-CHVHVVPHLACVGLLI-
E_Ha_Pavlovaes@KAJ1626513 : -----RDFADFMTRAAVPLATNALPDSVLRMPETL-FAFLG-HAATTE-VDPPD-ED-ELHEK-CHVHVVPHLACVGLLI-
B_PV_Verrucomicrobiales_bacterium@MAH41484 : -----EQLVIEGWRGVIVDAGLTPSPKRGITAFALATAAAYAFKLRGAGHE-DGTM-PASDENG-----HFLTITVTVGAIATIFT-
u_P1_Pleurochrysis_sp_endemic_virus@AUD57302 : -----VEVIDYRALIVKVLGEPISRAALAGALITAGVYLAKE-NEAR-DCSIE-PLKYLSP-----EPDAIYAHFLDQVVIATATDIFT-
u_P1_Pleurochrysis_sp_endemic_virus@AUL80787 : -----LPFVTTDRGMVAALGLGNVPTRAFVAGSIAAGVAYSSSE-QAARE-DGTE-ERKWSVP-----EPDAIYAHFLDQVVIATATDIFT-
B_PV_Planctomycetaceae_bacterium@MAT69668 : -----AFVILGARVMVMMGLNPTRAFVAGSIAAGVAYSSSE-QAARE-DGTE-ERKWSVP-----EPDAIYAHFLDQVVIATATDIFT-
B_PV_Planctomycetaceae_bacterium@MAT73275 : -----NCPVIKGAKGVAVVILGLTPEPARAVGATIAGCGAYACGIRAA-DE-EGKCF-ERKPFAA-----GVEGIIYHFLAIIPAVGATDIFT-

```

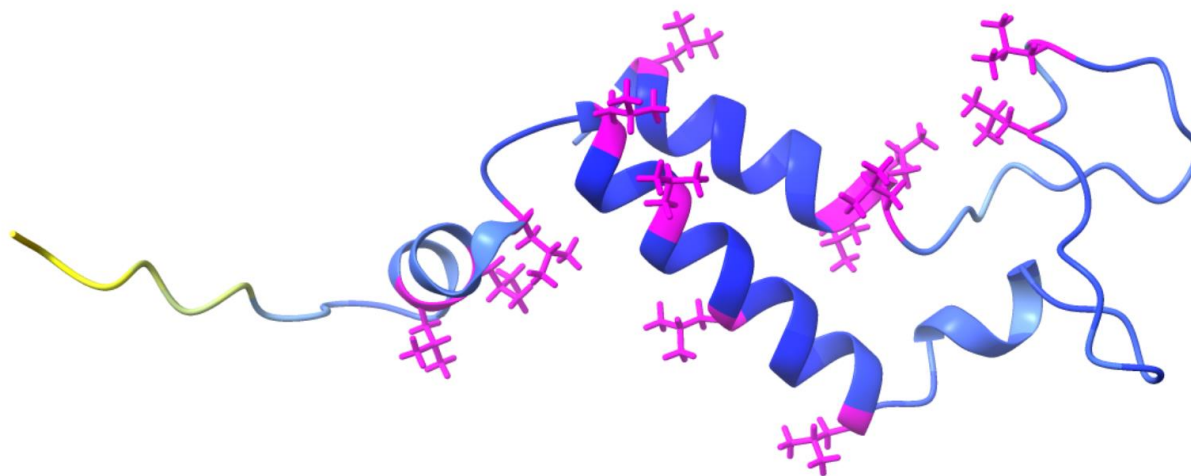

Mriya\_50 (Ple2@KY346835\_21)



```
genel_consensus : ENYKSEVDEEKRRIYVWIKGEGSEFED-----WCRPEYGR-QQTHL-----FDREYRSFVDARHEFEMCQI-----REYGE-QNT-EGARVYFYHW-----GRPWEDK-----STEDFLDD-----WAK :
Yara@MT293574_1 : GPNGTVLDTQSRHEANRKRMDARGEVPVVRDSSTYNAMASTYTRVIDARMQAYSSIIAQLNAGGGAEAVLDAYLRGFHCFLRGRPEEHEORKKLGMKPTFEFFRQESQQYKAFSRVVKKEYYEDAM-----RMOGETGD-----HIFIEYFYHW-----D-GKEDERIE-----RNLWHNLEK-GKLEK :
Ga0498833_000002_4 : MNKDDSVNAKEFAEYVSLICHTSGSVYRIIREETCANPEYQLLNDCTNDFEY-----MNSGNWVDRQPEIGR--VDAYG-----DEBRTIQTYLDRHRMISKTIN-----RIDGE-RSE-AGHIEFFYHW-----GSIKDFGTR--PIPELFLDS-DFED :
Yara_contig_24_8 : GDVKSVDKSRYIKNHLNLTNGTPLEV-----AVPEGR-RYAGN-----DS-SDIEMYPERRAQFLVYAF-----DLHKE-RTI-CQWVYFYHW-----NPDVTDWVK-----RHMDEEIED--DELK :
Yara_contig_12_41 : ASFQDAIGDAYFEDVWIKRQCESEWVWPVANLPTXA--LSPNEGQVYVENPDF--GDGLKLGIAEFLMLGSEYENKKNVVKRRILP-IGN-KATFTL-----PTIRAFDAYEDARMDGIVYAF-----RNNSE-SNT-AGAVYVWAVY-----GGVIHGDI--AEIFREFEY-YDETP :
Yara_contig_15_28 : RPHLTGEEKKWFDAANAKCPCQHMNDRLRTPWLRDH-----MLWCKGEAR-CENRLET-VPG-----DD-SIEFGAIVTTANRYKCO-DIL-----KTAFS-GG- QDSYFYHW-----PDD-----PAPPPRVFG----- :
Ga0172380_10001380_25 : RLKESIIRKNDRDIFRAMCQNSKFNTR-----ISCFEES-KP-FHV-----KG-RFESSELDMHWDFRKPITL-----CTYGGDDI--NIDYFYHW-----AHHWADMAK--ASGGDPVFP-----WYR :
Yara_contig_14_8 : QDEVPPEQKLEFRDVIWIKGSEVPVDQKNNTPLWKNAPSEWWDQKVPV-----DQKADRTKYIPG-----EDAKFNSINSAREKFAKQEDL-----GITFK-GG-MDAVYFYHW-----GNRQPGS--STDDPIVSK--WLG :
Ga0498922_0001740_7 : PCAISEAEKKFYIDITWMLNPNKNTDEKTIWLEKKG-----SRVEHRQ-KN-SYF-----IDDARFGIFETHREREFCQSETL-----RIRGE-SS-VGAVYFYHW-----ESSGNFLDD-FKFLP :
Ga0118731_112995586_40 : NEVFSRIKKEEARGRRKWRHGRGLQSEH-----EKFGT-YK-KHN-----ANAGFDQIDRKSLELRNARFYVY-ESRGE-EV-SVGLAFYFYHW-----C-GMT-----PVTAEFYDE--WQC :
Ga0316204_10002591_27 : EHARIAEQDFHREPTKWLPSKSYNTI-----TIRKGESLNLPEKDCSAANHN-----SEAGVDSYVNDKTDYSKRRERK-RLRGE-TN-HYLYFYHW-----KAPYDEA-LQINDYLLD--KCP :
Pates@JAHIZF010000067_14 : SSEMTAQDRNYWFDYGLDCEGRNEDH-----KNRGR-QP-LS-----KDTRKDSFYARTNEFKKWEPRK-NLRSE-MN-SMR-LHYFYHW-----NKGMDVY--TDLEDLA--WF- :
Ga0364575_11239_30 : STIGAHVKKAFVKDHWALDCEGRPEDV-----VKEFGP-QP-TDD-----PEEAWSLFPTKMQAFVKEFDL-----ASRRP-LG-NQCFYFYHW-----GDVNAV--DRDEAFNSE--FLK :
Yara_contig_5_27 : LFMKDEINSEFARDIILWLCWTTSDPE-----NDLARFGR-QP-LL-----PDREKAMIVDRKMDYKREIIL-CQKFP-TN-KQCFYFYHW-----GHCITPKD--MDYLEIDD-RNYLD :
Yara_contig_16_20 : ENKKEGSDSEFALDIFWVILGLKFPVDN-----CKEFPV-HR-AD-----PEKAWGSFVDARLAFKARDIMRAQPSLGLL-RG-LDRFYFYHW-----SAEPD-GPTAEYLD--VAL :
Yara_contig_20_5 : EDHASSVDKDFKLEKVMISNGEPEDV-----LRFEGN-QP-PD-----EDKAVSFLQAKLDFTLQIVIRAY-NGGGL-QG-KHIFYFYHW-----AGWES--ADMNDYMDD--YSL :
Ga0364485_12008_6 : ESLETQINSDFIVDQKWLCEGRPEDH-----QRKEFP-HR-AD-----KCNATVSVFLDARLAFKARDIMRAQPSLGLL-RG-LDRFYFYHW-----GGWDD--CTLFAD--WLS :
Ga0498839_000020_1 : SKLSDTIDADFSEKPYGRLRSGEEDH-----VKEFGR-HR-TD-----DEBRTIENSFAEAKIEFLQKQVYKAK-RLGGL-DG-NYFYFYHW-----GGWED--RSSAEFLYD--WNK :
Yara_contig_23_6 : NALNDQADAEFSKGFARLCEHGSSEDDH-----VKEFGR-HR-TD-----AEHRVNSFAEAKIDIFQKQVYKAK-RLGGL-EG-NYFYFYHW-----GGWED--RSSAEFLYD--WNK :
Ga0114338_1000305_9 : ANLSGEADAEFSKGFARLCEHGSSEDDH-----VKEFGR-HR-TD-----KDRVNSFAEAKIDIFQKQVYKAK-NTGL-DG-SHIFYFYHW-----GGWED--RSSAEFLYD--WNK :
Ga0373638_0002274_24 : KNIKGGQAQTIINDIHRHLIGSEDDH-----RKBYR-TP-HH-----KDRVNSFVDAKIDIAEFLQKQVYKAK-CYRKE-RN-DCIFYFYHW-----GNLYD--LNTSEFLAD--WPK :
Ga0456371_00004425_19 : DGVKPGVQAQFAVDRWALRSGKENDH-----LKYQR-QP-KE-----RSIQNDGFIIEERHKLAAEAF-----KATGE-RD-NQAFYFYHW-----SGDPHQ--IPTATFLSD----- :
Yara_contig_13_27 : QDSEKQIEHDFLIDVWVILRGTGPKDK-----RKQD--GF-ML-----FGREKNSFVDARVDMMAEVP-----HTFGE-DD-PSAVFYFYHW-----GGYLK--DEDDAYLD--EID :
OpTDRAFT_10003127_42 : RNFEKAEADALHAEQDMLRHHANQPGMDLYMNEV---GAPVRRHVAGEQ-----VGCPMDGWHQ-CGR-QQTHL-----DGRDRHRKQAIKRDEAEQLNFI-----AEYGE-SM-KQAFYFYHW-----KRFVKLSP--ASTTIDYDE--IGT :
Ga0163179_10000277_1 : RNLEEEADEALHGEQDMLRHEVNVDP---NDLYNNHAPGAPVRRHIYGPD-----VGKPEMGWHH-E-RE-RQTHL-----AGREHRAQAQAKNENELNFI-----AEHGE-QM-CQAFYFYHW-----PLSGPYKAPRGGYGI :
Ga0315315_10009687_16 : DNYKDEADECLKREEDMLRCAHEDNVQKET-----SKNTRKAIIFYKDGKV-----PGDTMEQWRH-WGR-HQTHL-----FGREKRMIRQNAAEQELCOQ-----AEFGQ-QM-E-SQFYFYHW-----GRQLGPEE---CVTPSYEHN-AGEFA :
Ga0494542_000028_26 : ENYKNEAEQALKNEEDMLRCEHPSNNG--DNLYSNGD--GKPARRWAFQGTM-----CGGNA-----VGMREGWRH-N-GR-AETHL-----FGREKRMHQVEGMEGDEITNFI-----ADYGE-QD-E-APFYFYHW-----GRFVSDAT--PLVPSYEG-RDMRH :
Ga0211528_10000821_15 : EYKNEAEDECLKAEEDMLRCEHPSNNG--DNLYSNGD--GKPARRWAFQGTM-----DLNGGYK-----VGCPRAGWRH-E-GR-AQTHV-----HGREKRETAEAHAKHDEVPQI-----AEHGE-QM-KQAFYFYHW-----GRPLSDA---VCLDHFEEK--IGQ :
Ga0181408_1000174_30 : GDYKQEADECLKREEDMLRCEHHDANLA--EELYENEC--GKPVRRWVFRTEQ-----DLEGGYK-----VGCPRAGWRH-E-GR-AGTHL-----FGREKRETRDARHRDVEQI-----AEYGE-QM-D-APFYFYHW-----GRPLSDA---VCLDPIAPK--PGV :
Ga0494526_002560_7 : ALYKQEADECLKREEDMLRCEHRCMDPDADQEVYNAD--GKPVRRWVFRTEQ-----SDDINGGSK-----VGCPRAGWRH-E-GR-AS-THL-----FGREKRDQIEKAMDADRQI-----AEFGQ-QM-E-APFYFYHW-----GRPLSDAV--ALPARETEQ--AHGT :
gamad_contig_21_43 : AHFKQEADECLKREEDMLRCEHDSMDPDADHEVTNAD--GKPVRRWVFRTEQ-----AEDENGSK-----VGCPRAGWRH-E-GR-AQ-TGL-----FGREKRMQREKTAHRNDLQI-----AEFGQ-QM-E-APFYFYHW-----GRPLSDAV--ALPARETEQ---AP :
Ga0115012_10003168_4 : ANYKNEAEDECLKAEEDMLRCEHRCMDPSGHELYENAD--GKPVRRWVFRTEQ-----AMDDGGWK-----VSCPRAGWRH-E-GR-TP-TYL-----FGREKRAQREKAHEEDTKQI-----AEFGQ-QD-D-APFYFYHW-----GRPLSDA---VAIQPYDE--MFE :
Verruc@NZEQ01000048_13 : ANYKNEAEDECLKAEEDMLRCEHREANDTSKEGVYENAD--GKPVRRWVFRTEQ-----STDAEGHSK-----VGCPRAGWRH-E-GR-AS-LHL-----FGREKRMQREKSHEDMDQI-----AEFGQ-QM-D-APFYFYHW-----GRPLSDAV--AIFARYPTD--EVVS :
Flayob@PALCO1000034_21 : SNYKNEAEDECLKREEDMLRCEHDLNNA--HVYRNKD--GMCQRFFVFRDTHA--SGGERDGGGGHSGN-----PTDTLKEWHF-WGR-GS-AFL-----FGREKRDQIGAEAEHEYMNI-----AEFGQ-QM-D-APFYFYHW-----GRPLTEAT--CLMHPKKE--KGR :
Ga0494425_001988_11 : ENYKNEAEDECLKSESNQMLRCEHDLNNA--TIAYFNDE--NAAQRFFVFRDTHA--HRNAGGGVACDPNDLPGCKMDDWRF-WGR-GS-THL-----FGREKRSDAIFANDESELTNMI-----AEFGQ-QM-D-APFYFYHW-----GRFVSEATCL-QKTAHATDN--NEDP :
Fla1a@KY131436_15 : ENYCAAADGKLEKEDMLRCEHHDNHR--RLYENDPQSGKPRRHHVFDHR-----HGCLQNDWST-S-GR-TQ-THL-----FGREKRDIAATKREQNEQNI-----AEHGE-QM-E-APFYFYHW-----GRPLNTH---LSTLEINN-RELGN :
Fla2@RY346835_29 : QGYKNEAEFEELHNEVWVILRCESHDNYA--PATYNGR--GKPRRRHVDFGE-----VGSERTDWVH-H-GR-TQ-THI-----FGREKRMKSVESKMDNDLNI-----AEFGQ-QM-E-APFYFYHW-----ARPLTKRKLTMGNAEDPMD-DGIGQ :
```

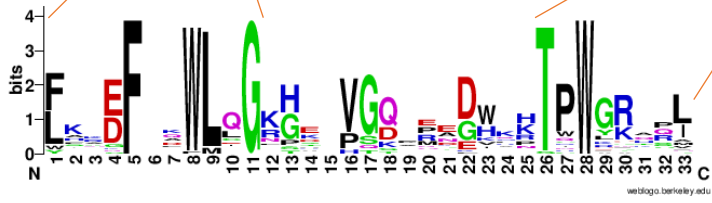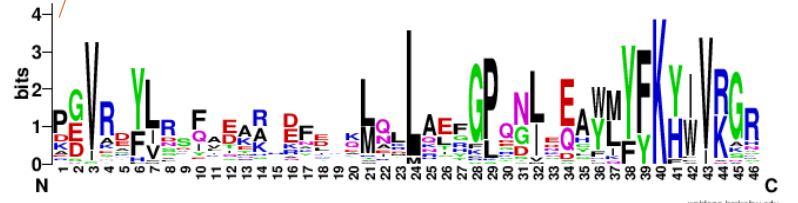

weblogo.barkley.edu

weblogo.barkley.edu

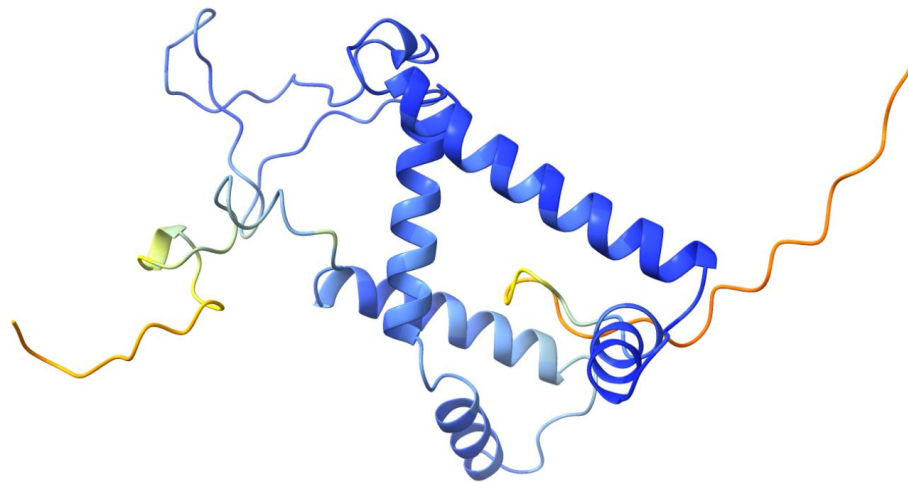

Mriya\_1, exemplified with Ple2@KY346835\_29



## A

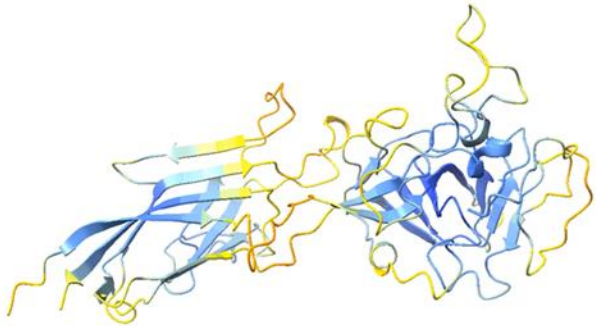

Foldseek:  
4 uncharacterized proteins

Dali  
6.4, 6g41-A, MOLECULE: MINOR CAPSID PROTEIN;  
→ Cafeteriavirus-dependent mavirus (Varidnaviria, Bamfordvirae, Preplasmiviricota)  
5.4, 3j26-N, MOLECULE: CAPSID PROTEIN V20;  
→ resolution structure of the Sputnik virophage by cryo-EM

## B

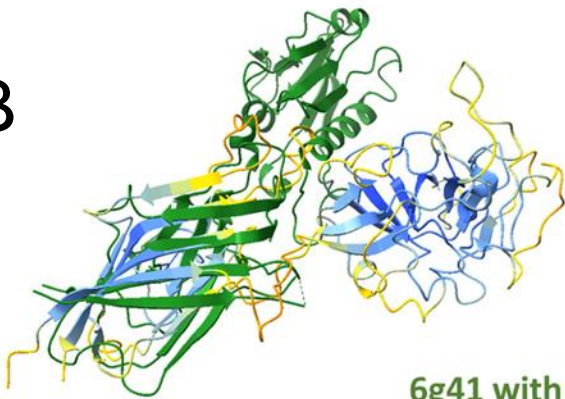

**6g41 with SJR (overlaid with Ple\_22)  
and insertion domain**

## PEV\_26 - ssb

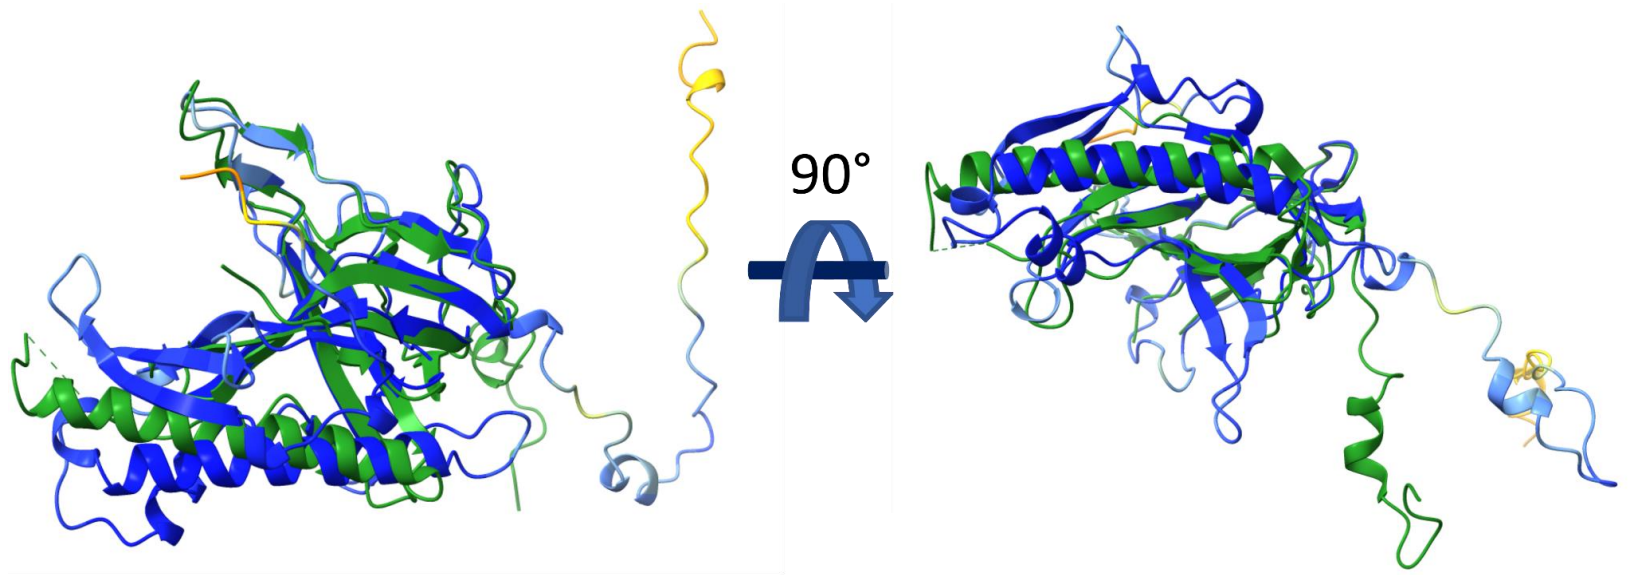



Yaravirus minor capsid protein (YP\_010800666.1)

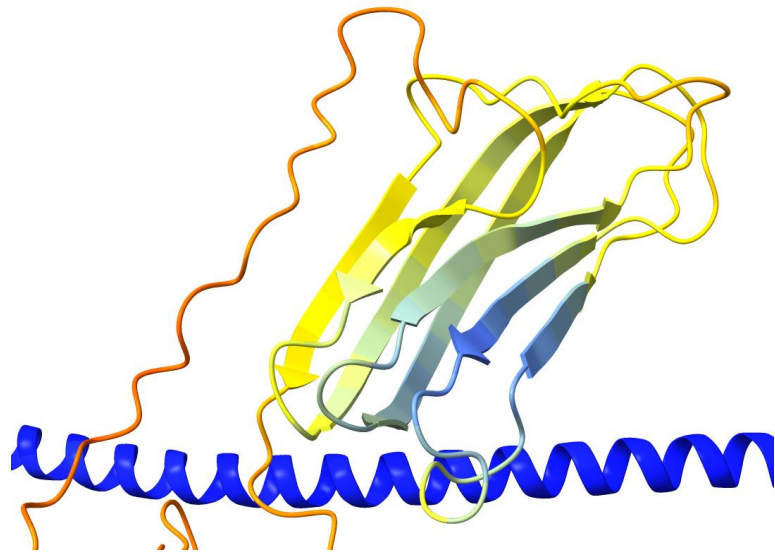

## Yaravirus minor capsid protein (C-terminal of YP\_010800666.1)

```

1 : -----*-----20-----*-----40-----*-----60-----*-----80-----*-----100-----*-----120-----*-----140-----: --
2 : MSHNCQSNPEPDTVYYDIIVIPYNPDSGLSPATFQAQLTQLLNYNPKDYKLVSVRFISIPTQYVPLMPEIQPFNTNVNNTIYVSTLEYNVGFSSQTFQYDVSLNPNNDTPPPP-----PTLNRRVTEPTAYYYVY : 132
3 : -----MASAPPVYSDAPYKRIPHSIDVDQLYIRGSKLAT-----TGSDVGLVAVVDEHEGR-----DAVE--SV-----TTNNS--LALKE-----: 71
4 : -----NFVVYDSVDNKLKPLTSTVVPTYWFPGAVAD-----AIGALQTNKVSWSVDPDYDNLAR-----TANSAI-----TTNNTTSLPAKC-----: 73
5 : -----TLQTSVSTLQTDVAANTLDISNLCT-----DVATNTGDIATLQGGVATNTVDI-----GNTSDI-----STIQTT-----KE-----: 63
6 : -----IGTLQTDVTTLQGGVATNTSNITLQGG-----QVSTNTSNITLQGG-----V-----ARNTSNI-----STIQTT-----KE-----: 58
7 : -----TNITLQGGVATNTDISNLCTQVSTNTSNITLQGGVSTLQTDVATNTLFDIGNLQTDFTTLQGGVNTNLLDISTLQTNVSTLQGGTSTNTN-----ARNTSNI-----STIQTT-----KE-----: 109
8 : -----TNTNTIATNTSNIISTLQGGTATNTNITLQGG-----QVSTNTSISTLQTDVSTNTADIGTLQGGVATNTN-----ARNTSNI-----STIQTT-----KE-----: 98
9 : -----LALHTGAACIAIGDSALSANTTQGYNTAVGDHA-----LTATATMSGNTGYGYHALMAATS-----ATNSTAIGAAATLEKATAGTNTAVGYRSFNATTTGNNAGVGFQSGNTVTTGARNICGDGADTNSA : 122
10 : -----AHATASPAVAVGYRALASNTTGGYNTAGGYQA-----LANNTSANGNTAYGYNLLTTTSDMGATNSTATGAGSLEKATAGTNTADGYRSYLNLTGNNAGVNSGLAITTSRRNICGDGADTNS : 124
n
1 : -----*-----160-----*-----180-----*-----200-----*-----220-----*-----240-----*-----260-----*-----280-----: --
2 : -----QMINTALENAENETSAVPGADAEFFFYDSNTEKISLIAQAAYDRTLLTPIEYICNVNLFTEFDSKHHIGLGNTPGRDI-LFDVRFILGNYYQDPETA-----PSYPP-----EFIQMQUEY--PTLSNNAVK : 123
3 : NFSFPLQMINIALSDAETETMPVGAVAEYFVYSPVTQRISLVAQRQFDRNLAQPIRIYCNEALFPELDGPFGGLEFNSVDGRDI-LFNVENIGNLVQNQLTA-----PAYPP-----EFIQMEQY--ATLSNNAIK : 261
4 : -----DKNKDAVSGTAGIDSSAKLPIST-----TLATLPQGGLLTSTNGTNSFLSPGNGQILSVGGSGVLSIAAAPTSGSGVSDQTTMGLRIKTTPNATVPTSGVATKTTILQVTVPAQVHGQIFRGGCTI : 198
4 : -----DISQNNQNGVGVGDAGQVGS-----ASNVRGAMT-----LNVNCRIGDAGWSPGFASG-----TISVWKVMTDFYNYNNA-----YGAGFKGTGKTFKKAARDA-----LVSVKALAE : 175
5 : -----NKSEGVSGGCPLTVSATPVVPEST-----NLGIATKPVNGSLY-----FPFYTRLSLT-ADWSPGATG-----TFNRVWVQNDTAYALNNA-----YGSQPKGATNINRRCPRDA-----VVFVFNIAE : 170
6 : -----NVANQGALNGAPVYGGT-----VEAT-----YLATATKTVNGTME-----YPEYTRLSLT-ANWSPGATG-----TISRWWVQNDTSYTLNLL-----YGSQPKGATNISFWKCPRDA-----VVFVFNMAE : 162
7 : -----NKSEGVSGGCPLTVSATPVVPEST-----NLAVATKTVNGSLY-----FPFYTRLSLT-ADWSPGATG-----TVSRWWVQNDTAYTLNNA-----YGSQPKGATNVSFWKCPRDA-----VVFVFNMAE : 216
8 : -----DKSNQVSGGCPLTVSATPVVPEST-----NLAVATKTVNGSLY-----FPFYTRLSLT-ADWSPGATG-----TINRWWVQNDTSYALNNA-----YGAGFKGATNITFWKCPRDA-----VVFVFNIAE : 205
9 : -----TAADRIALGRNAVATADGQFALPAAIT-----HLLMAGLGVHGTNAPIPLSIDSTGIVRKAPTEFSSVSLS-TEFT-GSALNLTTFNNNDV-----KIHDTPSG-----EGSSF-----STWTCPRDA-----RVIVTFNFAE : 239
10 : -----SAVDRIALGRGAVATADGQFALPAAVT-----QLLMAGLGTQPNLYPIPLSIDSSGIVRKSLEFSSVSLS-TEFT-GSALNLTTFNNNDV-----KICETPSG-----EGAST-----AFWTCPRDA-----LVIITANFAE : 241
p f 5 6 n
1 : -----*-----300-----*-----320-----*-----340-----*-----360-----*-----380-----*-----400-----*-----: --
2 : IIQ-----LVSNLIPNKESIPFRNSV-----LIINAQGILADEVPLVTNGPEARISIDEVATGPARLIDMFEGVITIMVVDLVYVTDQGGQYINPPGRILLTCKLVFIKKSLSKYLVSSEK : 238
3 : IIQ-----LVSNLIPNREFIPFRNTV-----EVVNSQGILADEVPLVTLLGPESRTSDYVANGPARLIDMFEGVITIMVVDLVYVTDQIGRRFLDPRGRIATCKLFIKDLAGHTLSRK : 376
4 : GDP-----INIEAVRSGVFGAKSASADFGSSIFFGSTLLINANTGGTGH-----TIAEADNTVTHPTRNPIRVTGSSNALADTGAQV-----AFIEV-IGPEVEF-----: 293
4 : SVASATNKPFTLRITPVPDPARTPTPHOYNY-----GIINSTTGSQSSFAVDIPTRVGSLSL-----EINFTLGGNANTPKDK-ITYL-----HTEASNGIVANDWFP-----: 271
5 : SVPVASVNRFFETFRNVPITVPANTLPHSYNY-----GIENYTSYSSEASSLIIPRQGCITISE-----LANNV-----GQNEAYGRD-ITYL-----HCOEVSFGVYDPSL-----: 260
6 : SVA-TSTNRFFETVLTVPVPANTLPHOYNY-----GIENYSGSYSSEASSLIIPRQGCITIQE-----NANMS-----GQS-APQLD-ITYY-----HSDVSFGVYDPSL-----: 251
7 : SVP-TSTNRFFETVLTVPVPANTPPPQYNY-----GIENYASSYSSEASSLIIPRQGCITIQE-----NANNA-----GSNEAPQAT-ITYY-----HNEISFGVYDPSL-----: 305
8 : SVA-TSTNRFFETVLTVPVPANTPPPQYNY-----GIENYASSYSSEASSLIIPRQGCITIQI-----NANVA-----GQS-APQTT-ITYY-----HNEISFGVYDPSL-----: 294
9 : SCP-AAINRYQLAVTVPVNSNTAPVYVNY-----GIENYGGSYSSEASSQRAIRQGCITVW-----KASVN-----GQCVGQNT-ITN-----QISEI-----GYPYG-----: 324
10 : SCP-TTIRRYBQLVNAVSTGATHAPVYVNY-----GIENYGGSYSSEASSQRSIRAGCITSW-----KASVN-----GQCVGQNT-ITN-----QISEI-----GYPYGS-----: 327
n f p n g6 1 6 w g p G

```

1 Sputnik\_UMZ08530.1 minor virion protein [Mimivirus-dependent virus Sputnik]

2 Zamilon\_YP\_008859634.1 minor virion protein [Zamilon virus]

3 YP\_010800667.1 hypothetical protein QKS73\_gp57 [Yaravirus brasiliensis]

4 YP\_010800666.1:200-470 tail needle DNA stabilization protein [Yaravirus brasiliensis]

5 YP\_009507121.1:265-524 chromosome segregation protein (SMC) [Tunisivirus fontaine2]

6 YP\_009094634.1:305-555 hypothetical protein MEL\_133 [Melbournevirus]

7 YP\_009345180.1:241-545 hypothetical protein B1750\_gp035 [Noumeavirus]

8 YP\_009238991.1:321-614 hypothetical protein A3303\_gp486 [Brazilian marseillevirus]

9 YP\_010804828.1:961-1284 hypothetical protein QKU73\_gp304 [Acanthamoeba castellanii medusavirus]

10 YP\_010802084.1:451-777 hypothetical protein QKT49\_gp315 [Acanthamoeba castellanii medusavirus]
